# Supplementary material for: Genome-Wide Association Studies of Salt Tolerance at the Seed Germination Stage and Yield-Related Traits in Brassica napus L
Source: Int J Mol Sci. 2022 Dec 14;23(24):15892. doi: 10.3390/ijms232415892 (PMC9785822; doi:10.3390/ijms232415892)
Supplement: Supplementary file 1 [file ijms-23-15892-s001.zip › Supplementary Materials.xlsx]

## Sheet: Table S1
Table S1. Distribution of SLAF tags on 19 chromosomes.
Chromosome	SLAF number	polymorphic SLAF	Polymorphic rate
A01	17873	9706	0.543054
A02	19516	10289	0.527208
A03	23446	12588	0.536893
A04	14608	8290	0.567497
A05	17374	9992	0.575112
A06	19521	10743	0.55033
A07	18333	9962	0.543392
A08	14877	7524	0.505747
A09	26405	13335	0.505018
A10	14205	8170	0.57515
C01	29558	14090	0.47669
C02	33842	15970	0.471899
C03	45761	19354	0.422937
C04	36586	16170	0.441972
C05	34257	12571	0.366961
C06	29261	11945	0.408223
C07	34232	13051	0.381251
C08	31008	13496	0.435243
C09	36669	12386	0.337779
SLAF, specific-locus amplified fragment.

## Sheet: Table S2
Table S2. The linkage disequilibrium declines in 19 chromosomes.
Chromosome	R2/2	R2/2_LD Decay	0.1_ LD Decay
A01	0.32	1.76	6.49
A02	0.29	1	28.87
A03	0.31	0.91	24.36
A04	0.29	0.84	7.55
A05	0.26	0.54	28.62
A06	0.31	1.22	73.07
A07	0.29	1.37	28.72
A08	0.33	1.46	10.37
A09	0.31	0.8	90.01
A10	0.29	0.85	10.24
C01	0.37	18.94	NA
C02	0.28	0.88	45.85
C03	0.33	4.94	103.12
C04	0.33	1.06	300.59
C05	0.28	1.39	51.28
C06	0.34	12.13	89.87
C07	0.35	1.06	323.39
C08	0.35	15.17	194.92
C09	0.32	0.91	40.59
oilseed	0.3	1.09	300.33

## Sheet: Table S3
Table S3. Significant SNPs associated with three salt-related tratis in B. napus.
Trait	Chromosome	SNP	Position (bp)	-log10 (P)	FASTLMM	GLM	Rep1	Rep1-R2 (%)	Rep2	Rep2-R2 (%)	Alleles
GV	A06	rsA06_20144629	20144629	4.07	√		√				C/T
GV	C02	rsC02_18404473	18404473	4.12	√		√				T/A
GV	C06	rsC06_33843163	33843163	5.54	√		√				A/T
GV	C06	rsC06_33843171	33843171	5.54	√		√				T/G
GV	C06	rsC06_33843172	33843172	5.54	√		√				C/G
GV	C09	rsC09_12645586	12645586	4.2	√		√				T/C
GV	C09	rsC09_12645583	12645583	4.04	√		√				T/G
GV	A03	rsA03_17921019	17921019	4.02		√	√	12.6			T/C
GV	A04	rsA04_1701171	1701171	4.05		√	√	11.6			A/G
GV	C02	rsC02_33195655	33195655	4.68		√	√	14.3			T/G
GV	C05	rsC05_35888047	35888047	4.25		√	√	9.9			C/A
GV	C05	rsC05_35888124	35888124	4.25		√	√	9.9			T/C
GV	A06	rsA06_18110621	18110621	4.26	√				√		C/A
GV	C07	rsC07_22388174	22388174	4.23	√				√		G/A
GV	A01	rsA01_12196539	12196539	4.06		√			√	13.4	G/C
GV	A05	rsA05_1723300	1723300	4		√			√	13	T/G
GV	C04	rsC04_8071481	8071481	4.17		√			√	12.4	A/T
GV	C04	rsC04_8071480	8071480	4.17		√			√	12.4	C/A
GV	C04	rsC04_8071491	8071491	4.17		√			√	12.4	T/C
GV	C04	rsC04_8071504	8071504	4.14		√			√	12.4	T/G
GV	C08	rsC08_31802916	31802916	4.05		√			√	13.9	C/G
GV	A03	rsA03_16375764	16375764	5.96/5.26	√		√		√		A/G
GV	A05	rsA05_6692275	6692275	4.59/4.25	√		√		√		T/A
GV	C05	rsC05_31987857	31987857	4.79/4.46	√		√		√		C/T
GV	C05	rsC05_31987934	31987934	5.01/4.37	√		√		√		G/A
GV	C06	rsC06_33843164	33843164	5.63/4.04	√		√		√		C/G
GV	C06	rsC06_33843483	33843483	5.61/4.03	√		√		√		A/G
GV	C06	rsC06_33843558	33843558	5.61/4.03	√		√		√		A/G
GV	A05	rsA05_17682405	17682405	4.46/4.44		√	√	13.1	√	13.1	A/G
GV	A09	rsA09_13997974	13997974	4.52/4.75		√	√	14.2	√	14.9	G/A
GV	A09	rsA09_13997990	13997990	4.44/4.67		√	√	13.9	√	14.6	G/A
GV	C01	rsC01_14634279	14634279	4.13/4.2		√	√	12.2	√	12.4	T/G
GR	A02	rsA02_3530820	3530820	4.16	√				√		G/A
GR	A05	rsA05_18700305	18700305	4.21	√				√		C/T
GR	A09	rsA09_31840807	31840807	4.36	√				√		G/A
GR	C09	rsC09_12521248	12521248	4.5	√				√		C/T
GR	A06	rsA06_22471588	22471588	4.44/4.15	√		√		√		A/G
GR	A06	rsA06_22471644	22471644	4.44/4.15	√		√		√		T/C
RSDI	A07	rsA07_19459527	19459527	4.25	√				√		A/C
RSDI	A07	rsA07_19459628	19459628	4.03	√				√		G/A
RSDI	C04	rsC04_5933539	5933539	4.24	√				√		A/T
RSDI	C04	rsC04_5933820	5933820	4.24	√				√		C/G
RSDI	C04	rsC04_5933538	5933538	4.23	√				√		T/A
RSDI	C04	rsC04_5933579	5933579	4.18	√				√		T/C
RSDI	A10	rsA10_15189187	15189187	4.34/4.27	√		√		√		C/T
RSDI	A10	rsA10_15189200	15189200	4.24/4.31	√		√		√		T/C
RSDI	A10	rsA10_15189284	15189284	4.24/4.31	√		√		√		A/G
GV/GR	C01	rsC01_5630138	5630138	4.35/4.41	√		√				C/A
GV/GR	C01	rsC01_2940514	2940514	4.14/4.48	√		√				G/C
GR/RSDI	C01	rsC01_6879990	6879990	4.03/4.68	√		√				A/G
GR/RSDI	C01	rsC01_6880327	6880327	4.42/5.05	√		√				G/A
GR/RSDI	C01	rsC01_6880347	6880347	4.45/5.14	√	√	√	11.4/11.4			C/G
GV/GR/RSDI	A03	rsA03_26172686	26172686	4.34 4.47/4.33 4.35	√		√				G/A
GV/GR/RSDI	C05	rsC05_31987525	31987525	6.15/4.99 4.47 4.81	√		√				A/T
GR/RSDI	C03	rsC03_13384422	13384422	4.03/4.03		√			√	11.2/11.2	G/A
GR/RSDI	C03	rsC03_13384442	13384442	4.03/4.03		√			√	11.2/11.2	C/G
GV/GR/RSDI	C05	rsC05_41484371	41484371	4.37/4.03/4.03		√			√	12.1/13.4/12.1	T/A
GV/GR	A02	rsA02_8228124	8228124	5.05 4.37/4.12	√		√		√		A/T
GV/GR	A03	rsA03_26173037	26173037	4.47 4.19/4.34	√		√		√		G/C
GV/GR	A05	rsA05_3162995	3162995	4.26/4.42 4.19	√		√		√		A/G
GV/GR	A05	rsA05_5280751	5280751	4.47/4.08 5.12/4.72	√		√		√		C/G
GV/GR	C09	rsC09_12521335	12521335	4.55/4.15 4.62	√		√		√		C/A
GR/RSDI	A05	rsA05_3343343	3343343	4.62/4.29 4.16	√		√		√		C/T
GR/RSDI	A05	rsA05_3343351	3343351	4.62/4.29 4.16	√		√		√		G/A
GR/RSDI	C08	rsC08_38115759	38115759	4.17/4.19 4.17/4.19		√	√	12.35/12.35	√	12.36/12.36	G/T
GV/GR/RSDI	A02	rsA02_2496879	2496879	5.56/4.61 4.29/5.35 4.19/4.65	√		√		√		T/C
GV/GR/RSDI	A05	rsA05_1728617	1728617	4.24 5.73/5.65 4.49/4.09	√		√		√		G/A
GV/GR/RSDI	A05	rsA05_6670181	6670181	4.7/4.24 4.44/4.13 4.43/4.1	√		√		√		C/T
GV/GR/RSDI	A05	rsA05_6692257	6692257	5.37/4.77 4.25/4.05 4.30	√		√		√		A/C
GV/GR/RSDI	A05	rsA05_16051518	16051518	4.37/4.79 4.39/4.10 4.01/5.08	√	√	√	13.35	√	13.35	C/A
GV/GR/RSDI	A10	rsA10_15188859	15188859	4.23 4.17/4.64 4.67/5.34	√		√		√		C/A
GV/GR/RSDI	C02	rsC02_33196025	33196025	5.69/4.96 4.96/4.49 4.96/4.49		√	√	17.68/15.27/15.27	√	15.71/14.06/14.06	C/A
GV/GR/RSDI	C02	rsC02_33196054	33196054	5.66/4.9 4.91/4.41 4.91/4.41		√	√	17.48/15.06/15.06	√	15.44/13.77/13.77	C/A
GV/GR/RSDI	C08	rsC08_35846448	35846448	4.07/4.36 4.27/4.23 4.27/4.23		√	√	12.76/13.04/13.04	√	13.64/12.93/12.93	C/G
GV/GR/RSDI	C09	rsC09_12949548	12949548	6.91/5.39 5.42/5.99 5.17/4.26	√	√	√		√		G/T
GV/GR/RSDI	C09	rsC09_12949561	12949561	6.91/5.39 5.42/5.99 5.17/4.26	√	√	√		√		A/G
GV/GR/RSDI	C09	rsC09_34383182	34383182	4.94/4.89 4.41/4.73 4.41/4.73		√	√	14.46/12.76/12.76	√	14.43/13.69/13.69	G/T
Rep1/2, two biological replicates; GLM, general linear model; FaST-LMM, factored spectrally transformed linear mixed model; Rep1/2-R2 (%), percentage of phenotypic variance explained by each associated marker; GV, germination vigor; GR, germination rate; RSDI, relative salt damage index.

## Sheet: Table S4
Table S4. Significant SNPs associated with six yield-related traits in B. napus.
Trait	Chromosome	SNP	Position (bp)	P-value	-log10 (P)	FASTLMM	GLM	Year	R2 (%)	Alleles	Interval (bp)	SNP number	QTL	Repeatable QTL
SL	A01	rsA01_1725245	1725245	1.98289e-05	4.7	√		2018	0	C/T	1725245-2247850	5	qSL18-A1.1
SL	A01	rsA01_1725278	1725278	2.30509e-05	4.64	√		2018	0	C/A
SL	A01	rsA01_1725283	1725283	2.09827e-05	4.68	√		2018	0	C/T
SL	A01	rsA01_2040554	2040554	9.5577e-08	7.02		√	2018	19.879	T/C
SL	A01	rsA01_2247850	2247850	3.1223e-05	4.51		√	2018	15.796	C/T
SL	A01	rsA01_8390753	8390753	4.2762e-07	6.37		√	2018	18.995	G/A	7890753-8890753	1	qSL18-A1.2
SL	A02	rsA02_8407803	8407803	4.52827e-05	4.34	√		2018	0	G/A	7907803-8907803	1	qSL18-A2.1	√
SL	A02	rsA02_15815024	15815024	5.63882e-05	4.25/4.77	√	√	2018	16.357	G/A	15315024-16315024	1	qSL18-A2.2
SL	A02	rsA02_19960714	19960714	9.69432e-05	4.01	√		2018	0	T/A	19960714-20017934	2	qSL18-A2.3
SL	A02	rsA02_20017934	20017934	4.36935e-06	5.36/4.66	√	√	2018	12.978	C/T
SL	A03	rsA03_9799826	9799826	1.32e-08	7.88		√	2018	22.413	A/C	9299826-10299826	1	qSL18-A3.1	√
SL	A04	rsA04_12303459	12303459	4.2489e-05	4.37		√	2018	12.173	G/A	11803459-12803459	1	qSL18-A4.1
SL	A04	rsA04_14149179	14149179	7.05984e-05	4.15	√		2018	0	A/T	13649179-14649179	1	qSL18-A4.2
SL	A04	rsA04_17076130	17076130	4.41334e-06	5.36/6.6	√	√	2018	17.747	G/A	16576130-17576130	1	qSL18-A4.3	√
SL	A05	rsA05_5266578	5266578	9.3684e-05	4.03		√	2018	12.254	C/G	5266578-5266980	5	qSL18-A5.1
SL	A05	rsA05_5266608	5266608	8.3899e-05	4.08		√	2018	12.567	A/G
SL	A05	rsA05_5266626	5266626	8.3899e-05	4.08		√	2018	12.567	T/C
SL	A05	rsA05_5266633	5266633	8.3899e-05	4.08		√	2018	12.567	G/C
SL	A05	rsA05_5266980	5266980	9.7926e-05	4.01		√	2018	12.397	T/G
SL	A05	rsA05_6694267	6694267	9.3302e-05	4.03		√	2018	12.23	T/C	6194267-7194267	1	qSL18-A5.2
SL	A06	rsA06_3198293	3198293	2.14532e-05	4.67/4.03	√	√	2018	9.973	T/C	3198293-3198304	3	qSL18-A6.1
SL	A06	rsA06_3198296	3198296	2.74278e-06	5.56/4.81	√	√	2018	12.141	T/G
SL	A06	rsA06_3198304	3198304	1.13378e-05	4.95	√		2018	0	G/C
SL	A06	rsA06_7000328	7000328	5.68497e-05	4.25/4.42	√	√	2018	13.503	C/G	7000328-7000396	3	qSL18-A6.2
SL	A06	rsA06_7000331	7000331	3.27929e-05	4.48/4.45	√	√	2018	13.708	T/A
SL	A06	rsA06_7000396	7000396	2.4304e-05	4.61		√	2018	13.936	T/A
SL	A07	rsA07_499259	499259	1.2973e-05	4.89/5.19	√	√	2018	12.263	A/T	0-999259	1	qSL18-A7.1
SL	A07	rsA07_10685635	10685635	1.4223e-08	7.85		√	2018	20.683	G/A	10185635-11185635	1	qSL18-A7.2
SL	A09	rsA09_8691832	8691832	1.81272e-05	4.74	√		2018	0	T/C	8191832-9191832	1	qSL18-A9.1
SL	A09	rsA09_12870203	12870203	7.7295e-05	4.11		√	2018	11.78	G/A	12870203-13824672	13	qSL18-A9.2
SL	A09	rsA09_12870238	12870238	7.7295e-05	4.11		√	2018	11.78	G/T
SL	A09	rsA09_13824206	13824206	2.0038e-05	4.7		√	2018	15.182	A/T
SL	A09	rsA09_13824214	13824214	2.3959e-05	4.62		√	2018	15.275	G/A
SL	A09	rsA09_13824228	13824228	2.0038e-05	4.7		√	2018	15.182	A/G
SL	A09	rsA09_13824301	13824301	2.0038e-05	4.7		√	2018	15.182	A/T
SL	A09	rsA09_13824602	13824602	2.0038e-05	4.7		√	2018	15.182	T/C
SL	A09	rsA09_13824612	13824612	2.0038e-05	4.7		√	2018	15.182	G/A
SL	A09	rsA09_13824623	13824623	2.0038e-05	4.7		√	2018	15.182	C/T
SL	A09	rsA09_13824626	13824626	1.1728e-05	4.93		√	2018	15.975	G/A
SL	A09	rsA09_13824627	13824627	2.0038e-05	4.7		√	2018	15.182	T/G
SL	A09	rsA09_13824664	13824664	2.5021e-05	4.6		√	2018	15.511	A/G
SL	A09	rsA09_13824672	13824672	2.1995e-05	4.66		√	2018	15.236	G/T
SL	A09	rsA09_24078912	24078912	3.48261e-05	4.46	√		2018	0	T/A	24078912-25048133	2	qSL18-A9.3
SL	A09	rsA09_25048133	25048133	1.5483e-08	7.81		√	2018	21.017	T/C
SL	A09	rsA09_27745423	27745423	7.14312e-05	4.15	√		2018	0	T/G	27745423-28339525	7	qSL18-A9.4	√
SL	A09	rsA09_27928233	27928233	1.09554e-07	6.96/5.31	√	√	2018	15.313	T/G
SL	A09	rsA09_27928290	27928290	1.22401e-07	6.91/5.3	√	√	2018	15.174	C/T
SL	A09	rsA09_28076545	28076545	8.86043e-06	5.05	√		2018	0	C/T
SL	A09	rsA09_28076553	28076553	2.02921e-05	4.69	√		2018	0	T/G
SL	A09	rsA09_28263185	28263185	2.80423e-05	4.55	√		2018	0	A/G
SL	A09	rsA09_28339525	28339525	7.11723e-08	7.15/8.8	√	√	2018	24.544	C/T
SL	A09	rsA09_29957791	29957791	5.69782e-08	7.24/5.99	√	√	2018	17.053	T/C	29457791-30457791	1	qSL18-A9.5
SL	A09	rsA09_31910855	31910855	2.9553e-07	6.53		√	2018	20.51	T/C	31410855-32410855	1	qSL18-A9.6
SL	A10	rsA10_5164398	5164398	4.7585e-05	4.32		√	2018	13.515	T/C	4664398-5664398	1	qSL18-A10.1
SL	C02	rsC02_3837990	3837990	8.4157e-13	12.07		√	2018	31.834	C/A	3837990-3838019	2	qSL18-C2.1
SL	C02	rsC02_3838019	3838019	1.0121e-12	11.99		√	2018	31.807	C/T
SL	C02	rsC02_43316081	43316081	6.2426e-05	4.2		√	2018	14.332	G/A	42816081-43816081	1	qSL18-C2.2
SL	C03	rsC03_18121221	18121221	5.93303e-05	4.23	√		2018	0	G/A	17621221-18621221	1	qSL18-C3.1
SL	C03	rsC03_33736818	33736818	9.42214e-05	4.03	√		2018	0	G/T	33236818-34236818	1	qSL18-C3.2
SL	C03	rsC03_40955108	40955108	8.28083e-05	4.08	√		2018	0	C/A	40455108-41455108	1	qSL18-C3.3
SL	C04	rsC04_440807	440807	8.83828e-05	4.05	√		2018	0	T/C	440807-440879	3	qSL18-C4.1	√
SL	C04	rsC04_440808	440808	6.97139e-05	4.16	√		2018	0	T/A
SL	C04	rsC04_440879	440879	5.70909e-05	4.24	√		2018	0	T/A
SL	C04	rsC04_5551524	5551524	4.2138e-08	7.38		√	2018	19.75	C/G	5051524-6051524	1	qSL18-C4.2
SL	C04	rsC04_10917204	10917204	1.8586e-05	4.73		√	2018	13.803	C/T	10917204-10917209	2	qSL18-C4.3
SL	C04	rsC04_10917209	10917209	2.3843e-05	4.62		√	2018	13.512	A/T
SL	C05	rsC05_3345499	3345499	8.59221e-05	4.07	√		2018	0	A/T	3345499-3345599	5	qSL18-C5.1
SL	C05	rsC05_3345563	3345563	3.31652e-05	4.48	√		2018	0	A/T
SL	C05	rsC05_3345584	3345584	3.31652e-05	4.48	√		2018	0	C/T
SL	C05	rsC05_3345593	3345593	3.31652e-05	4.48	√		2018	0	T/C
SL	C05	rsC05_3345599	3345599	3.31652e-05	4.48	√		2018	0	G/A
SL	C06	rsC06_29100326	29100326	7.67055e-05	4.12/4.3	√	√	2018	10.144	A/G	28600326-29600326	1	qSL18-C6.1
SL	C07	rsC07_1433569	1433569	6.2906e-05	4.2		√	2018	11.73	G/A	933569-1933569	1	qSL18-C7.1
SL	C07	rsC07_8597032	8597032	6.6437e-05	4.18		√	2018	11.718	T/C	8597032-8597493	11	qSL18-C7.2
SL	C07	rsC07_8597054	8597054	6.6437e-05	4.18		√	2018	11.718	A/C
SL	C07	rsC07_8597100	8597100	6.6437e-05	4.18		√	2018	11.718	T/A
SL	C07	rsC07_8597104	8597104	6.6437e-05	4.18		√	2018	11.718	G/T
SL	C07	rsC07_8597105	8597105	6.6437e-05	4.18		√	2018	11.718	C/T
SL	C07	rsC07_8597384	8597384	6.6437e-05	4.18		√	2018	11.718	T/C
SL	C07	rsC07_8597392	8597392	6.6437e-05	4.18		√	2018	11.718	T/C
SL	C07	rsC07_8597405	8597405	6.6437e-05	4.18		√	2018	11.718	C/A
SL	C07	rsC07_8597431	8597431	6.6437e-05	4.18		√	2018	11.718	A/G
SL	C07	rsC07_8597482	8597482	6.6437e-05	4.18		√	2018	11.718	C/T
SL	C07	rsC07_8597493	8597493	6.6437e-05	4.18		√	2018	11.718	A/C
SL	C09	rsC09_9022481	9022481	4.2498e-08	7.37		√	2018	19.815	T/C	8522481-9522481	1	qSL18-C9.1
SL	A01	rsA01_10156765	10156765	1.66553e-05	4.78/8.32	√	√	2019	26.777	G/A	9656765-10656765	1	qSL19-A1.1
SL	A02	rsA02_993357	993357	9.9901e-05	4		√	2019	11.598	G/T	993357-2128309	4	qSL19-A2.1
SL	A02	rsA02_1123903	1123903	8.18376e-05	4.09/4.8	√	√	2019	13.737	C/T
SL	A02	rsA02_2111348	2111348	9.2611e-05	4.03		√	2019	11.687	G/C
SL	A02	rsA02_2128309	2128309	3.8186e-05	4.42		√	2019	14.639	G/A
SL	A02	rsA02_8551356	8551356	1.95541e-05	4.71	√		2019	0	C/T	8051356-9051356	1	qSL19-A2.2	√
SL	A02	rsA02_10778708	10778708	4.2521e-08	7.37		√	2019	25.417	C/T	10278708-11278708	1	qSL19-A2.3
SL	A02	rsA02_14283938	14283938	5.91549e-05	4.23	√		2019	0	C/G	14283938-14502335	3	qSL19-A2.4
SL	A02	rsA02_14283978	14283978	8.76065e-05	4.06	√		2019	0	C/T
SL	A02	rsA02_14502335	14502335	1.72605e-05	4.76/4.11	√	√	2019	13.55	G/A
SL	A02	rsA02_17009160	17009160	1.5822e-05	4.8		√	2019	14.695	G/C	17009160-17071093	3	qSL19-A2.5
SL	A02	rsA02_17009161	17009161	6.707e-05	4.17		√	2019	12.913	T/G
SL	A02	rsA02_17071093	17071093	8.3993e-06	5.08		√	2019	15.478	T/G
SL	A03	rsA03_1594456	1594456	1.6174e-05	4.79		√	2019	13.828	G/C	1594456-1594521	7	qSL19-A3.1
SL	A03	rsA03_1594464	1594464	1.6174e-05	4.79		√	2019	13.828	T/C
SL	A03	rsA03_1594472	1594472	1.6174e-05	4.79		√	2019	13.828	C/G
SL	A03	rsA03_1594491	1594491	1.6244e-05	4.79		√	2019	13.823	A/G
SL	A03	rsA03_1594501	1594501	1.6852e-05	4.77		√	2019	13.781	G/T
SL	A03	rsA03_1594504	1594504	1.6174e-05	4.79		√	2019	13.828	A/C
SL	A03	rsA03_1594521	1594521	1.6174e-05	4.79		√	2019	13.828	T/C
SL	A03	rsA03_4102284	4102284	3.5232e-08	7.45		√	2019	21.155	C/T	4102284-4102301	3	qSL19-A3.2
SL	A03	rsA03_4102289	4102289	4.1126e-08	7.39		√	2019	20.987	G/A
SL	A03	rsA03_4102301	4102301	4.1126e-08	7.39		√	2019	20.987	A/G
SL	A03	rsA03_9818217	9818217	4.14679e-05	4.38	√		2019	0	A/T	9318217-10318217	1	qSL19-A3.3	√
SL	A03	rsA03_15404026	15404026	8.9366e-06	5.05		√	2019	17.364	C/A	14904026-15904026	1	qSL19-A3.4
SL	A03	rsA03_21872876	21872876	5.32651e-05	4.27	√		2019	0	A/C	21872876-22814161	8	qSL19-A3.5
SL	A03	rsA03_21872947	21872947	5.08526e-05	4.29	√		2019	0	A/G
SL	A03	rsA03_21935561	21935561	6.91082e-05	4.16	√		2019	0	A/G
SL	A03	rsA03_21935640	21935640	6.91082e-05	4.16	√		2019	0	T/C
SL	A03	rsA03_22134974	22134974	9.22594e-06	5.03	√		2019	0	T/A
SL	A03	rsA03_22135262	22135262	3.38839e-05	4.47	√		2019	0	A/G
SL	A03	rsA03_22135265	22135265	3.38839e-05	4.47	√		2019	0	T/A
SL	A03	rsA03_22814161	22814161	8.80624e-05	4.06	√		2019	0	T/A
SL	A04	rsA04_4700698	4700698	8.6937e-06	5.06		√	2019	16.414	A/C	4200698-5200698	1	qSL19-A4.1
SL	A04	rsA04_16520464	16520464	4.21662e-05	4.38	√		2019	0	C/A	16520464-17389937	6	qSL19-A4.2	√
SL	A04	rsA04_16885078	16885078	5.1238e-11	10.29		√	2019	27.029	T/A
SL	A04	rsA04_16885090	16885090	5.1238e-11	10.29		√	2019	27.029	A/G
SL	A04	rsA04_17076098	17076098	1.32107e-06	5.88/5.17	√	√	2019	14.7	A/T
SL	A04	rsA04_17076190	17076190	1.32107e-06	5.88/5.17	√	√	2019	14.7	T/C
SL	A04	rsA04_17389937	17389937	4.77103e-05	4.32	√		2019	0	A/G
SL	A05	rsA05_16991833	16991833	1.9131e-07	6.72		√	2019	21.423	A/C	16491833-17491833	1	qSL19-A5.1
SL	A06	rsA06_23969352	23969352	9.2628e-08	7.03		√	2019	21.428	G/A	23469352-24469352	1	qSL19-A6.1
SL	A09	rsA09_17265204	17265204	8.69607e-07	6.06/4.97	√	√	2019	17.424	T/A	17265204-17265222	2	qSL19-A9.1
SL	A09	rsA09_17265222	17265222	8.69607e-07	6.06/4.97	√	√	2019	17.424	T/C
SL	A09	rsA09_27925698	27925698	7.18451e-05	4.14	√		2019	0	T/C	27925698-28703533	2	qSL19-A9.2	√
SL	A09	rsA09_28703533	28703533	2.75976e-05	4.56	√		2019	0	G/A
SL	C01	rsC01_3539337	3539337	6.5837e-05	4.18		√	2019	12.601	C/G	3039337-4039337	1	qSL19-C1.1
SL	C02	rsC02_34641980	34641980	6.9569e-05	4.16		√	2019	12.887	C/T	34141980-35141980	1	qSL19-C2.1
SL	C03	rsC03_3272977	3272977	7.607e-08	7.12		√	2019	23.037	C/T	3272977-3273347	3	qSL19-C3.1
SL	C03	rsC03_3272992	3272992	6.6744e-08	7.18		√	2019	23.059	G/A
SL	C03	rsC03_3273347	3273347	7.8256e-08	7.11		√	2019	23.066	G/A
SL	C03	rsC03_10521468	10521468	7.9194e-05	4.1		√	2019	13.4	T/C	10021468-11021468	1	qSL19-C3.2
SL	C07	rsC07_4965313	4965313	1.3551e-08	7.87		√	2019	25.261	G/A	4965313-4965600	3	qSL19-C7.1
SL	C07	rsC07_4965403	4965403	1.3225e-08	7.88		√	2019	25.328	T/G
SL	C07	rsC07_4965600	4965600	1.1735e-08	7.93		√	2019	25.245	A/T
SL	C07	rsC07_10872725	10872725	2.5075e-06	5.6		√	2019	16.964	T/G	10872725-11310749	14	qSL19-C7.2
SL	C07	rsC07_10872737	10872737	2.677e-06	5.57		√	2019	17.028	G/A
SL	C07	rsC07_10872753	10872753	2.5075e-06	5.6		√	2019	16.964	G/A
SL	C07	rsC07_10872759	10872759	2.5075e-06	5.6		√	2019	16.964	C/T
SL	C07	rsC07_10872801	10872801	2.677e-06	5.57		√	2019	17.028	G/T
SL	C07	rsC07_10872815	10872815	2.5075e-06	5.6		√	2019	16.964	T/G
SL	C07	rsC07_10873035	10873035	2.2213e-06	5.65		√	2019	17.208	G/A
SL	C07	rsC07_10873066	10873066	2.4762e-06	5.61		√	2019	17.045	G/A
SL	C07	rsC07_10873092	10873092	2.5075e-06	5.6		√	2019	16.964	C/T
SL	C07	rsC07_10873100	10873100	2.5075e-06	5.6		√	2019	16.964	G/T
SL	C07	rsC07_10873110	10873110	2.7582e-06	5.56		√	2019	16.998	G/T
SL	C07	rsC07_11310713	11310713	1.7676e-08	7.75		√	2019	23.084	T/C
SL	C07	rsC07_11310743	11310743	1.7676e-08	7.75		√	2019	23.084	A/T
SL	C07	rsC07_11310749	11310749	1.7676e-08	7.75		√	2019	23.084	G/T
SL	C07	rsC07_43410166	43410166	3.7026e-05	4.43		√	2019	12.76	C/T	43410166-43410174	2	qSL19-C7.3
SL	C07	rsC07_43410174	43410174	3.7026e-05	4.43		√	2019	12.76	G/A
SL	C08	rsC08_2736162	2736162	6.8574e-05	4.16		√	2019	12.7	T/A	2236162-3236162	1	qSL19-C8.1
SL	C08	rsC08_19260767	19260767	3.0225e-07	6.52		√	2019	21.106	A/G	18760767-19760767	1	qSL19-C8.2
SL	C08	rsC08_25245353	25245353	9.7938e-06	5.01		√	2019	17.015	G/A	24745353-25745353	1	qSL19-C8.3
SL	C09	rsC09_17894101	17894101	8.33e-05	4.08		√	2019	14.596	C/A	17394101-18394101	1	qSL19-C9.1
SL	C09	rsC09_22829462	22829462	6.6448e-08	7.18		√	2019	20.282	A/C	22829462-22829882	3	qSL19-C9.2
SL	C09	rsC09_22829773	22829773	7.2499e-08	7.14		√	2019	20.286	C/T
SL	C09	rsC09_22829882	22829882	7.2053e-06	5.14		√	2019	15.165	G/T
SL	A01	rsA01_21869828	21869828	4.1359e-05	4.38		√	2020	14.05	T/G	21869828-21869864	21	qSL20-A1.1
SL	A01	rsA01_21869829	21869829	4.1359e-05	4.38		√	2020	14.05	T/G
SL	A01	rsA01_21869830	21869830	4.1359e-05	4.38		√	2020	14.05	A/T
SL	A01	rsA01_21869835	21869835	4.5512e-05	4.34		√	2020	14.029	T/A
SL	A01	rsA01_21869837	21869837	2.8017e-05	4.55		√	2020	14.549	A/T
SL	A01	rsA01_21869838	21869838	4.6331e-05	4.33		√	2020	13.933	C/A
SL	A01	rsA01_21869840	21869840	3.6181e-05	4.44		√	2020	14.222	A/C
SL	A01	rsA01_21869841	21869841	4.2305e-05	4.37		√	2020	14.14	T/A
SL	A01	rsA01_21869842	21869842	4.3128e-05	4.37		√	2020	14.098	T/A
SL	A01	rsA01_21869845	21869845	4.1359e-05	4.38		√	2020	14.05	A/T
SL	A01	rsA01_21869846	21869846	4.1359e-05	4.38		√	2020	14.05	C/G
SL	A01	rsA01_21869847	21869847	4.1359e-05	4.38		√	2020	14.05	C/T
SL	A01	rsA01_21869849	21869849	5.3982e-05	4.27		√	2020	13.736	A/T
SL	A01	rsA01_21869850	21869850	4.8551e-05	4.31		√	2020	13.844	T/A
SL	A01	rsA01_21869851	21869851	4.4101e-05	4.36		√	2020	14.19	G/T
SL	A01	rsA01_21869853	21869853	4.4101e-05	4.36		√	2020	14.19	A/G
SL	A01	rsA01_21869855	21869855	4.1359e-05	4.38		√	2020	14.05	G/T
SL	A01	rsA01_21869857	21869857	4.1359e-05	4.38		√	2020	14.05	A/T
SL	A01	rsA01_21869859	21869859	6.858e-05	4.16		√	2020	13.426	T/A
SL	A01	rsA01_21869860	21869860	4.1359e-05	4.38		√	2020	14.05	A/T
SL	A01	rsA01_21869864	21869864	4.1359e-05	4.38		√	2020	14.05	G/A
SL	A02	rsA02_708	708	1.23952e-05	4.91	√		2020	0	G/A	0-500708	1	qSL20-A2.1
SL	A02	rsA02_20970203	20970203	2.9571e-05	4.53		√	2020	13.807	C/T	20970203-22033057	2	qSL20-A2.2
SL	A02	rsA02_22033057	22033057	8.8463e-05	4.05		√	2020	12.72	G/A
SL	A05	rsA05_4566370	4566370	8.71477e-06	5.06	√		2020	0	A/C	4066370-5066370	1	qSL20-A5.1
SL	A05	rsA05_8517284	8517284	5.3085e-05	4.28	√		2020	0	G/A	8517284-8517304	2	qSL20-A5.2
SL	A05	rsA05_8517304	8517304	5.3085e-05	4.28	√		2020	0	C/T
SL	A07	rsA07_19903545	19903545	7.92086e-05	4.1	√		2020	0	T/G	19903545-20371096	3	qSL20-A7.1
SL	A07	rsA07_20371022	20371022	6.79983e-05	4.17	√		2020	0	C/T
SL	A07	rsA07_20371096	20371096	4.16635e-05	4.38	√		2020	0	T/G
SL	A08	rsA08_17168722	17168722	5.8862e-05	4.23		√	2020	14.87	G/A	16668722-17668722	1	qSL20-A8.1
SL	A08	rsA08_290121	290121	7.4052e-05	4.13		√	2020	12.779	T/G	0-790121	1	qSL20-A8.2
SL	A09	rsA09_28339525	28339525	8.78425e-05	4.06	√		2020	0	C/T	27839525-28839525	1	qSL20-A9.1	√
SL	C01	rsC01_33704890	33704890	1.28968e-05	4.89	√		2020	0	C/G	33204890-34204890	1	qSL20-C1.1
SL	C03	rsC03_47070992	47070992	2.21e-05	4.66		√	2020	13.664	C/A	46570992-47570992	1	qSL20-C3.1
SL	C04	rsC04_440879	440879	1.34905e-05	4.87	√		2020	0	T/C	440879-440807	3	qSL20-C4.1	√
SL	C04	rsC04_440808	440808	1.94697e-05	4.71	√		2020	0	T/A
SL	C04	rsC04_440807	440807	3.00899e-05	4.52	√		2020	0	T/A
SL	C04	rsC04_11656793	11656793	4.778e-05	4.32		√	2020	12.535	A/C	11156793-12156793	1	qSL20-C4.2
SL	C08	rsC08_30236940	30236940	5.0702e-05	4.29		√	2020	12.406	C/T	29736940-30736940	1	qSL20-C8.1
SS	A01	rsA01_2793951	2793951	5.59589e-05	4.25	√		2018	0	A/T	2293951-3293951	1	qSS18-A1.1
SS	A01	rsA01_5704317	5704317	7.24114e-05	4.14	√		2018	0	C/G	5704317-5865711	3	qSS18-A1.2
SS	A01	rsA01_5704320	5704320	7.24114e-05	4.14	√		2018	0	T/G
SS	A01	rsA01_5865711	5865711	9.95885e-05	4	√		2018	0	A/G
SS	A01	rsA01_8340640	8340640	4.08818e-05	4.39	√		2018	0	T/A	7840640-8840640	1	qSS18-A1.3
SS	A01	rsA01_22524676	22524676	8.78073e-05	4.06	√		2018	0	A/C	22024676-23024676	1	qSS18-A1.4
SS	A02	rsA02_10778684	10778684	8.00306e-05	4.1	√		2018	0	T/A	10278684-11278684	1	qSS18-A2.1
SS	A02	rsA02_12099627	12099627	7.60808e-05	4.12	√		2018	0	A/G	12099627-13073990	2	qSS18-A2.2
SS	A02	rsA02_13073990	13073990	5.98104e-05	4.22	√		2018	0	G/T
SS	A03	rsA03_16886848	16886848	6.11986e-05	4.21	√		2018	0	A/T	16386848-17386848	1	qSS18-A3.1
SS	A04	rsA04_6854801	6854801	9.27652e-06	5.03	√		2018	0	G/T	6854801-6855171	4	qSS18-A4.1
SS	A04	rsA04_6854830	6854830	2.38408e-06	5.62	√		2018	0	T/A
SS	A04	rsA04_6855157	6855157	2.38408e-06	5.62	√		2018	0	G/A
SS	A04	rsA04_6855171	6855171	3.58295e-06	5.45	√		2018	0	C/T
SS	A05	rsA05_18770878	18770878	9.14231e-05	4.04	√		2018	0	A/G	18770878-19244991	6	qSS18-A5.1
SS	A05	rsA05_18770881	18770881	9.94603e-05	4	√		2018	0	C/T
SS	A05	rsA05_18770933	18770933	9.33955e-05	4.03	√		2018	0	A/G
SS	A05	rsA05_18930935	18930935	2.8915e-05	4.54	√		2018	0	T/A
SS	A05	rsA05_19242391	19242391	2.08624e-05	4.68	√		2018	0	G/T
SS	A05	rsA05_19244991	19244991	2.18986e-05	4.66	√		2018	0	A/G
SS	A05	rsA05_20795444	20795444	3.57368e-05	4.45	√		2018	0	G/A	20295444-21295444	1	qSS18-A5.2
SS	A05	rsA05_22706444	22706444	4.84079e-05	4.32	√		2018	0	A/T	22206444-23206444	1	qSS18-A5.3
SS	A06	rsA06_1418870	1418870	7.26255e-05	4.14	√		2018	0	G/A	1418870-2475285	4	qSS18-A6.1
SS	A06	rsA06_1932961	1932961	8.58443e-05	4.07	√		2018	0	A/T
SS	A06	rsA06_1932993	1932993	8.58443e-05	4.07	√		2018	0	A/T
SS	A06	rsA06_2475285	2475285	4.07134e-05	4.39	√		2018	0	G/T
SS	A06	rsA06_4440295	4440295	8.38555e-05	4.08	√		2018	0	C/A	3940295-4940295	1	qSS18-A6.2
SS	A06	rsA06_14201416	14201416	3.94331e-05	4.4	√		2018	0	C/A	13701416-14701416	1	qSS18-A6.3	√
SS	A07	rsA07_5242229	5242229	4.24336e-05	4.37	√		2018	0	C/A	4742229-5742229	1	qSS18-A7.1
SS	A07	rsA07_10690229	10690229	1.04445e-05	4.98	√		2018	0	A/T	10190229-11190229	1	qSS18-A7.2
SS	A07	rsA07_13524811	13524811	4.02355e-05	4.4	√		2018	0	C/T	13024811-14024811	1	qSS18-A7.3
SS	A07	rsA07_21278978	21278978	7.2936e-05	4.14	√		2018	0	T/G	21278978-21279080	3	qSS18-A7.4
SS	A07	rsA07_21279032	21279032	7.26111e-05	4.14	√		2018	0	C/T
SS	A07	rsA07_21279080	21279080	7.12887e-05	4.15	√		2018	0	C/A
SS	A07	rsA07_22709932	22709932	1.03238e-05	4.99	√		2018	0	A/G	22209932-23209932	1	qSS18-A7.5
SS	A08	rsA08_8901193	8901193	1.29005e-05	4.89	√		2018	0	A/G	8901193-8901198	3	qSS18-A8.1
SS	A08	rsA08_8901196	8901196	1.29005e-05	4.89	√		2018	0	T/C
SS	A08	rsA08_8901198	8901198	1.29005e-05	4.89	√		2018	0	G/C
SS	A08	rsA08_10495355	10495355	1.08263e-05	4.97	√		2018	0	G/C	10495355-10495367	2	qSS18-A8.2
SS	A08	rsA08_10495367	10495367	4.70241e-06	5.33	√		2018	0	A/T
SS	C03	rsC03_34471704	34471704	3.47892e-07	6.46	√		2018	0	C/A	33971704-34971704	1	qSS18-C3.1
SS	C04	rsC04_37334381	37334381	3.14377e-06	5.5	√		2018	0	G/C	36834381-37834381	1	qSS18-C4.1
SS	C05	rsC05_13946572	13946572	5.87303e-07	6.23	√		2018	0	G/T	13446572-14446572	1	qSS18-C5.1
SS	C05	rsC05_29992466	29992466	5.55804e-05	4.26	√		2018	0	G/A	29992466-31689509	4	qSS18-C5.2
SS	C05	rsC05_30628141	30628141	5.14575e-05	4.29	√		2018	0	C/T
SS	C05	rsC05_30693280	30693280	6.77538e-05	4.17	√		2018	0	T/C
SS	C05	rsC05_31689509	31689509	4.59081e-05	4.34	√		2018	0	A/C
SS	C06	rsC06_8722066	8722066	1.66582e-06	5.78	√		2018	0	C/T	8722066-8722095	5	qSS18-C6.1
SS	C06	rsC06_8722068	8722068	4.76085e-07	6.32	√		2018	0	A/T
SS	C06	rsC06_8722090	8722090	4.76085e-07	6.32	√		2018	0	C/A
SS	C06	rsC06_8722094	8722094	1.66582e-06	5.78	√		2018	0	A/C
SS	C06	rsC06_8722095	8722095	1.09115e-06	5.96	√		2018	0	G/A
SS	C06	rsC06_22714190	22714190	1.2363e-07	6.91	√		2018	0	G/T	22214190-23214190	1	qSS18-C6.2
SS	C06	rsC06_30320865	30320865	1.56092e-06	5.81	√		2018	0	T/C	30320865-30320942	5	qSS18-C6.3
SS	C06	rsC06_30320900	30320900	1.56092e-06	5.81	√		2018	0	G/T
SS	C06	rsC06_30320901	30320901	6.43648e-07	6.19	√		2018	0	C/A
SS	C06	rsC06_30320920	30320920	1.95557e-06	5.71	√		2018	0	T/C
SS	C06	rsC06_30320942	30320942	6.43648e-07	6.19	√		2018	0	T/C
SS	C07	rsC07_19714238	19714238	4.03645e-05	4.39	√		2018	0	C/T	19214238-20214238	1	qSS18-C7.1
SS	C07	rsC07_37301215	37301215	2.2983e-05	4.64	√		2018	0	G/A	36801215-37801215	1	qSS18-C7.2
SS	C09	rsC09_23452736	23452736	1.75821e-05	4.75	√		2018	0	T/C	22952736-23952736	1	qSS18-C9.1
SS	A06	rsA06_14628518	14628518	8.68022e-05	4.06	√		2019	0	G/C	14128518-15128518	1	qSS19-A6.1	√
SS	A08	rsA08_2361865	2361865	2.4049e-05	4.62	√		2019	0	C/T	1861865-2861865	1	qSS19-A8.1
SS	A08	rsA08_16298584	16298584	2.02936e-05	4.69	√		2019	0	G/A	16298584-16298806	2	qSS19-A8.2
SS	A08	rsA08_16298806	16298806	2.36596e-05	4.63	√		2019	0	C/T
SS	A09	rsA09_6862211	6862211	7.71359e-05	4.11	√		2019	0	A/G	6862211-6862634	7	qSS19-A9.1
SS	A09	rsA09_6862226	6862226	7.71359e-05	4.11	√		2019	0	A/C
SS	A09	rsA09_6862239	6862239	8.13893e-05	4.09	√		2019	0	A/G
SS	A09	rsA09_6862251	6862251	7.71359e-05	4.11	√		2019	0	A/T
SS	A09	rsA09_6862285	6862285	7.71359e-05	4.11	√		2019	0	T/C
SS	A09	rsA09_6862620	6862620	7.71359e-05	4.11	√		2019	0	T/C
SS	A09	rsA09_6862634	6862634	7.71359e-05	4.11	√		2019	0	T/C
SS	C08	rsC08_1339105	1339105	4.60814e-05	4.34	√		2019	0	T/C	839105-1839105	1	qSS19-C8.1
SS	A03	rsA03_20928506	20928506	6.72554e-05	4.17	√		2020	0	T/G	20428506-21428506	1	qSS20-A3.1
SS	C09	rsC09_12905354	12905354	6.23767e-05	4.2	√		2020	0	A/G	12405354-13405354	1	qSS20-C9.1
SMI	A02	rsA02_15034138	15034138	9.5007e-05	4.02		√	2018	9.709	T/C	14534138-15534138	1	qSMI18-A2.1
SMI	A03	rsA03_11910605	11910605	9.4725e-05	4.02		√	2018	9.115	A/G	11410605-12410605	1	qSMI18-A3.1
SMI	A04	rsA04_10831520	10831520	9.3295e-06	5.03		√	2018	9.987	C/T	10331520-11331520	1	qSMI18-A4.1
SMI	A06	rsA06_10994517	10994517	6.6952e-05	4.17		√	2018	7.982	A/G	10494517-11494517	1	qSMI18-A6.1
SMI	A08	rsA08_11457156	11457156	9.10299e-05	4.04	√		2018	0	T/A	10957156-11957156	1	qSMI18-A8.1
SMI	C02	rsC02_33884451	33884451	7.4313e-05	4.13		√	2018	7.975	A/G	33384451-34384451	1	qSMI18-C2.1	√
SMI	C03	rsC03_9599030	9599030	3.8926e-05	4.41		√	2018	6.89	C/A	9599030-9599443	5	qSMI18-C3.1	√
SMI	C03	rsC03_9599371	9599371	3.8926e-05	4.41		√	2018	6.89	A/T
SMI	C03	rsC03_9599387	9599387	3.8926e-05	4.41		√	2018	6.89	C/A
SMI	C03	rsC03_9599436	9599436	3.8926e-05	4.41		√	2018	6.89	T/A
SMI	C03	rsC03_9599443	9599443	3.8926e-05	4.41		√	2018	6.89	G/A
SMI	C03	rsC03_11582756	11582756	6.3639e-05	4.2		√	2018	8.455	C/T	11082756-12082756	1	qSMI18-C3.2
SMI	C03	rsC03_15116586	15116586	2.00731e-05	4.7	√		2018	0	A/G	14616586-15616586	1	qSMI18-C3.3	√
SMI	C03	rsC03_31695290	31695290	9.33545e-05	4.03	√		2018	0	T/A	31695290-31695334	2	qSMI18-C3.4
SMI	C03	rsC03_31695334	31695334	8.46957e-05	4.07	√		2018	0	C/A
SMI	C03	rsC03_33955980	33955980	5.93167e-05	4.23	√		2018	0	G/A	33955980-33956002	2	qSMI18-C3.5
SMI	C03	rsC03_33956002	33956002	7.97018e-05	4.1	√		2018	0	G/C
SMI	C04	rsC04_15710223	15710223	6.5229e-05	4.19		√	2018	9.517	G/T	15210223-16210223	1	qSMI18-C4.1
SMI	C04	rsC04_40877888	40877888	5.2163e-05	4.28		√	2018	8.164	G/A	40377888-41377888	1	qSMI18-C4.2
SMI	C06	rsC06_21132142	21132142	5.07698e-05	4.29	√		2018	0	C/T	20632142-21632142	1	qSMI18-C6.1
SMI	C08	rsC08_35332975	35332975	1.96108e-05	4.71/4.09	√	√	2018	7.504	T/C	35332975-35333350	3	qSMI18-C8.1	√
SMI	C08	rsC08_35332981	35332981	1.96108e-05	4.71/4.09	√	√	2018	7.504	A/G
SMI	C08	rsC08_35333350	35333350	1.2466e-05	4.9/4.3	√	√	2018	7.863	A/G
SMI	C08	rsC08_37115937	37115937	9.6814e-05	4.01	√		2018	0	G/A	37115937-37116233	2	qSMI18-C8.2
SMI	C08	rsC08_37116233	37116233	9.6814e-05	4.01	√		2018	0	G/A
SMI	C09	rsC09_3080050	3080050	7.03228e-05	4.15	√		2018	0	A/C	2580050-3580050	1	qSMI18-C9.1
SMI	A02	rsA02_16078810	16078810	8.2305e-05	4.08		√	2019	13.419	G/A	15578810-16578810	1	qSMI19-A2.1
SMI	A05	rsA05_11305937	11305937	3.1801e-05	4.5		√	2019	13.447	G/T	10805937-11805937	1	qSMI19-A5.1
SMI	A05	rsA05_19361804	19361804	4.4394e-05	4.35		√	2019	15.13	T/C	18861804-19861804	1	qSMI19-A5.2	√
SMI	A07	rsA07_9493107	9493107	8.99612e-05	4.05	√		2019	0	C/T	8993107-9993107	1	qSMI19-A7.1
SMI	A09	rsA09_25028109	25028109	4.08182e-05	4.39	√		2019	0	A/T	24528109-25528109	1	qSMI19-A9.1
SMI	C01	rsC01_352881	352881	5.2092e-05	4.28		√	2019	13.036	C/T	352881-353274	2	qSMI19-C1.1
SMI	C01	rsC01_353274	353274	9.22539e-05	4.04/4.36	√	√	2019	13.322	T/G
SMI	C02	rsC02_2027145	2027145	9.3191e-05	4.03		√	2019	13.21	A/T	1527145-2527145	1	qSMI19-C2.1
SMI	C02	rsC02_14682050	14682050	4.4064e-05	4.36		√	2019	13.226	C/A	14182050-15182050	1	qSMI19-C2.2	√
SMI	C03	rsC03_7411500	7411500	6.6321e-05	4.18		√	2019	13.18	T/A	6911500-7911500	1	qSMI19-C3.1
SMI	C03	rsC03_12534789	12534789	8.84598e-05	4.05	√		2019	0	A/C	12534789-12588274	3	qSMI19-C3.2
SMI	C03	rsC03_12587991	12587991	8.61e-05	4.06	√		2019	0	T/C
SMI	C03	rsC03_12588276	12588276	8.61e-05	4.06	√		2019	0	A/G
SMI	C03	rsC03_15477280	15477280	8.5342e-06	5.07		√	2019	16.659	G/A	15477280-15477303	3	qSMI19-C3.3	√
SMI	C03	rsC03_15477294	15477294	8.5342e-06	5.07		√	2019	16.659	G/T
SMI	C03	rsC03_15477303	15477303	8.5342e-06	5.07		√	2019	16.659	G/T
SMI	C04	rsC04_46402030	46402030	9.0295e-05	4.04		√	2019	12.18	C/G	45902030-46902030	1	qSMI19-C4.1
SMI	C05	rsC05_16117518	16117518	4.29577e-05	4.37	√		2019	0	G/T	16117518-16117521	2	qSMI19-C5.1
SMI	C05	rsC05_16117521	16117521	4.29577e-05	4.37	√		2019	0	C/G
SMI	C05	rsC05_20165852	20165852	9.1532e-05	4.04		√	2019	12.163	G/A	19665852-20665852	1	qSMI19-C5.2
SMI	C07	rsC07_22977734	22977734	3.37473e-05	4.47	√		2019	0	A/G	22977734-22978110	9	qSMI19-C7.1
SMI	C07	rsC07_22977748	22977748	3.37473e-05	4.47	√		2019	0	T/C
SMI	C07	rsC07_22977790	22977790	2.86356e-05	4.54	√		2019	0	A/C
SMI	C07	rsC07_22977817	22977817	2.09414e-05	4.68	√		2019	0	G/A
SMI	C07	rsC07_22978046	22978046	3.37473e-05	4.47	√		2019	0	G/A
SMI	C07	rsC07_22978084	22978084	3.37473e-05	4.47	√		2019	0	T/G
SMI	C07	rsC07_22978085	22978085	3.37473e-05	4.47	√		2019	0	G/A
SMI	C07	rsC07_22978109	22978109	3.37473e-05	4.47	√		2019	0	G/A
SMI	C07	rsC07_22978110	22978110	3.37473e-05	4.47	√		2019	0	C/T
SMI	C07	rsC07_29669553	29669553	2.4105e-05	4.62/4.79	√	√	2019	12.118	T/C	29669553-29669587	3	qSMI19-C7.2
SMI	C07	rsC07_29669573	29669573	8.6479e-05	4.06		√	2019	12.233	A/G
SMI	C07	rsC07_29669587	29669587	8.6479e-05	4.06		√	2019	12.233	G/T
SMI	C08	rsC08_32229249	32229249	4.234e-05	4.37		√	2019	13.617	G/C	31729249-32729249	1	qSMI19-C8.1
SMI	C08	rsC08_33562461	33562461	9.2872e-05	4.03		√	2019	12.753	C/T	33562461-33562465	2	qSMI19-C8.2
SMI	C08	rsC08_33562465	33562465	9.2872e-05	4.03		√	2019	12.753	C/T
SMI	C09	rsC09_4115805	4115805	6.6449e-05	4.18		√	2019	13.706	T/C	3615805-4615805	1	qSMI19-C9.1
SMI	C09	rsC09_47432433	47432433	4.3395e-05	4.36		√	2019	14.832	A/G	47432433-47432538	4	qSMI19-C9.2
SMI	C09	rsC09_47432453	47432453	3.1176e-05	4.51		√	2019	15.139	A/G
SMI	C09	rsC09_47432460	47432460	3.9651e-05	4.4		√	2019	14.816	T/A
SMI	C09	rsC09_47432538	47432538	2.3201e-05	4.63		√	2019	15.542	G/A
SMI	A02	rsA02_281077	281077	3.7331e-05	4.43		√	2020	12.482	A/G	281077-281081	2	qSMI20-A2.1
SMI	A02	rsA02_281081	281081	1.7096e-05	4.77		√	2020	13.365	A/T
SMI	A02	rsA02_2397176	2397176	9.6391e-05	4.02		√	2020	11.281	C/A	1897176-2897176	1	qSMI20-A2.2
SMI	A02	rsA02_5570277	5570277	5.3385e-05	4.27		√	2020	12.376	A/T	5570277-5572202	2	qSMI20-A2.3
SMI	A02	rsA02_5572202	5572202	8.00241e-05	4.1	√		2020	0	C/G
SMI	A03	rsA03_5677452	5677452	4.99816e-05	4.3	√		2020	0	A/T	5677425-6678984	11	qSMI20-A3.1
SMI	A03	rsA03_5677844	5677844	8.55063e-05	4.07	√		2020	0	G/A
SMI	A03	rsA03_6431252	6431252	4.69078e-05	4.33	√		2020	0	T/C
SMI	A03	rsA03_6431256	6431256	4.69078e-05	4.33	√		2020	0	G/A
SMI	A03	rsA03_6431257	6431257	4.11906e-05	4.39	√		2020	0	A/C
SMI	A03	rsA03_6431264	6431264	4.69078e-05	4.33	√		2020	0	T/A
SMI	A03	rsA03_6431280	6431280	3.88335e-05	4.41	√		2020	0	T/A
SMI	A03	rsA03_6431292	6431292	8.02443e-05	4.1	√		2020	0	G/C
SMI	A03	rsA03_6431300	6431300	8.90152e-05	4.05	√		2020	0	T/G
SMI	A03	rsA03_6431308	6431308	6.78996e-05	4.17	√		2020	0	C/T
SMI	A03	rsA03_6678984	6678984	9.366e-06	5.03	√		2020	0	G/A
SMI	A03	rsA03_6794675	6794675	1.10689e-05	4.96/5.18	√	√	2020	14.744	T/A	6794675-7208901	5	qSMI20-A3.2
SMI	A03	rsA03_6859624	6859624	3.53055e-05	4.45	√		2020	0	G/T
SMI	A03	rsA03_6859678	6859678	3.49313e-05	4.46	√		2020	0	T/G
SMI	A03	rsA03_6859984	6859984	5.50639e-05	4.26	√		2020	0	A/C
SMI	A03	rsA03_7208901	7208901	6.88852e-05	4.16	√		2020	0	C/A
SMI	A05	rsA05_18668998	18668998	8.6775e-05	4.06		√	2020	12.696	T/A	18168998-19168998	1	qSMI20-A5.1	√
SMI	A06	rsA06_20713266	20713266	2.9442e-05	4.53		√	2020	12.598	G/T	20213266-21213266	1	qSMI20-A6.1
SMI	A07	rsA07_5108419	5108419	7.5879e-05	4.12		√	2020	12.38	T/C	5108419-6368706	3	qSMI20-A7.1
SMI	A07	rsA07_5407615	5407615	5.29137e-05	4.28/4.75	√	√	2020	16.195	T/A
SMI	A07	rsA07_6368706	6368706	3.34e-05	4.48		√	2020	14.624	G/T
SMI	A07	rsA07_23720277	23720277	5.9203e-05	4.23		√	2020	12.628	A/G	23720277-23720385	3	qSMI20-A7.2
SMI	A07	rsA07_23720298	23720298	9.8777e-05	4.01		√	2020	12.009	C/T
SMI	A07	rsA07_23720385	23720385	5.9203e-05	4.23		√	2020	12.628	A/G
SMI	A09	rsA09_13790019	13790019	7.6687e-05	4.12		√	2020	11.451	T/A	13790019-13790410	5	qSMI20-A9.1
SMI	A09	rsA09_13790048	13790048	7.6687e-05	4.12		√	2020	11.451	A/G
SMI	A09	rsA09_13790078	13790078	7.6687e-05	4.12		√	2020	11.451	G/A
SMI	A09	rsA09_13790084	13790084	7.6687e-05	4.12		√	2020	11.451	T/C
SMI	A09	rsA09_13790410	13790410	7.6687e-05	4.12		√	2020	11.451	T/C
SMI	A09	rsA09_21622072	21622072	4.9425e-05	4.31		√	2020	13.171	G/A	21122072-22122072	1	qSMI20-A9.2
SMI	A10	rsA10_10718049	10718049	2.5165e-06	5.6		√	2020	18.924	A/G	10218049-11218049	1	qSMI20-A10.1
SMI	C02	rsC02_14351316	14351316	9.79477e-05	4.01	√		2020	0	A/C	13851316-14851316	1	qSMI20-C2.1	√
SMI	C02	rsC02_33403029	33403029	7.384e-05	4.13		√	2020	12.606	C/T	33403029-33435155	3	qSMI20-C2.2	√
SMI	C02	rsC02_33434774	33434774	6.2454e-05	4.2		√	2020	12.045	G/T
SMI	C02	rsC02_33435155	33435155	3.8491e-05	4.41		√	2020	12.603	C/T
SMI	C02	rsC02_37328391	37328391	9.20806e-05	4.04	√		2020	0	C/T	36828391-37828391	1	qSMI20-C2.3
SMI	C03	rsC03_9599030	9599030	3.9876e-05	4.4		√	2020	10.237	C/A	9599030-9599443	5	qSMI20-C3.1	√
SMI	C03	rsC03_9599371	9599371	3.9876e-05	4.4		√	2020	10.237	A/T
SMI	C03	rsC03_9599387	9599387	3.9876e-05	4.4		√	2020	10.237	C/A
SMI	C03	rsC03_9599436	9599436	3.9876e-05	4.4		√	2020	10.237	T/A
SMI	C03	rsC03_9599443	9599443	3.9876e-05	4.4		√	2020	10.237	G/A
SMI	C04	rsC04_38999979	38999979	7.9181e-05	4.1		√	2020	10.897	G/A	38499979-39499979	1	qSMI20-C4.1
SMI	C05	rsC05_9492979	9492979	9.103e-05	4.04		√	2020	13.254	T/A	9492975-9492979	2	qSMI20-C5.1
SMI	C05	rsC05_9492975	9492975	9.5828e-05	4.02		√	2020	13.388	T/C
SMI	C07	rsC07_33592709	33592709	9.91056e-06	5/5.7	√	√	2020	13.448	C/A	33592709-33592744	2	qSMI20-C7.1
SMI	C07	rsC07_33592744	33592744	8.75917e-05	4.06/4.65	√	√	2020	10.865	G/C
SMI	C08	rsC08_34973684	34973684	2.145e-05	4.67		√	2020	13.06	C/T	34473684-35473684	1	qSMI20-C8.1	√
SMI	C09	rsC09_10392554	10392554	2.7441e-05	4.56		√	2020	14.486	G/T	9892554-10892554	1	qSMI20-C9.1
SMI	C09	rsC09_42705111	42705111	9.30072e-05	4.03	√		2020	0	A/C	42205111-43205111	1	qSMI20-C9.2
TSW	A06	rsA06_1812478	1812478	2.9773e-05	4.53		√	2018	10.071	C/A	1312478-2312478	1	qTSW18-A6.1
TSW	A07	rsA07_18738136	18738136	5.937e-05	4.23		√	2018	9.988	C/A	18238136-19238136	1	qTSW18-A7.1
TSW	A08	rsA08_2437816	2437816	6.1141e-05	4.21		√	2018	9.9	C/T	2437816-2473777	2	qTSW18-A8.1
TSW	A08	rsA08_2473777	2473777	2.7787e-05	4.56		√	2018	10.217	A/C
TSW	A08	rsA08_4971917	4971917	7.4578e-05	4.13		√	2018	9.322	A/G	4471917-5471917	1	qTSW18-A8.2
TSW	A08	rsA08_6829963	6829963	8.9422e-05	4.05		√	2018	7.533	G/A	6329963-7329963	1	qTSW18-A8.3
TSW	A08	rsA08_10841434	10841434	4.1664e-05	4.38		√	2018	10.654	A/C	10341434-11341434	1	qTSW18-A8.4
TSW	C03	rsC03_56689850	56689850	9.5529e-05	4.02		√	2018	8.95	C/G	56189850-57189850	1	qTSW18-C3.1
TSW	C05	rsC05_4456834	4456834	4.0624e-05	4.39		√	2018	8.224	C/A	3956834-4956834	1	qTSW18-C5.1
TSW	A02	rsA02_17740645	17740645	4.312e-05	4.37		√	2019	13.301	A/G	17740645-17740696	2	qTSW19-A2.1
TSW	A02	rsA02_17740696	17740696	3.7651e-05	4.42		√	2019	13.467	G/C
TSW	A03	rsA03_21087	21087	9.1326e-05	4.04		√	2019	14.705	T/A	0-521087	1	qTSW19-A3.1
TSW	A04	rsA04_4700698	4700698	2.9551e-05	4.53		√	2019	15.31	A/C	4200698-5200698	1	qTSW19-A4.1
TSW	A09	rsA09_28050920	28050920	2.754e-05	4.56		√	2019	13.534	T/C	28050920-28051279	2	qTSW19-A9.1
TSW	A09	rsA09_28051279	28051279	2.7519e-05	4.56		√	2019	13.535	C/T
TSW	C03	rsC03_49028253	49028253	9.5854e-05	4.02		√	2019	12.214	G/A	49028253-49028298	2	qTSW19-C3.1
TSW	C03	rsC03_49028298	49028298	9.5854e-05	4.02		√	2019	12.214	T/G
TSW	C06	rsC06_1690184	1690184	4.7531e-05	4.32		√	2019	13.255	T/G	1690184-2405964	2	qTSW19-C6.1
TSW	C06	rsC06_2405964	2405964	7.477e-06	5.13		√	2019	15.079	T/C
TSW	C06	rsC06_27900326	27900326	3.1072e-06	5.51		√	2019	16.409	A/T	27900326-27927073	3	qTSW19-C6.2
TSW	C06	rsC06_27900623	27900623	3.1072e-06	5.51		√	2019	16.409	T/C
TSW	C06	rsC06_27927073	27927073	3.9754e-05	4.4		√	2019	13.55	T/A
TSW	C07	rsC07_25881374	25881374	1.2356e-05	4.91		√	2019	16.084	C/T	25381374-26381374	1	qTSW19-C7.1
TSW	A03	rsA03_15765498	15765498	9.4121e-05	4.03		√	2020	12.232	T/A	15765498-15765534	2	qTSW20-A3.1
TSW	A03	rsA03_15765534	15765534	9.4121e-05	4.03		√	2020	12.232	A/G
TSW	A06	rsA06_19268486	19268486	6.5175e-05	4.19		√	2020	11.533	G/A	18768486-19768486	1	qTSW20-A6.1
TSW	A09	rsA09_5580719	5580719	1.3089e-05	4.88		√	2020	13.475	T/A	5080719-6080719	1	qTSW20-A9.1
TSW	A10	rsA10_13323226	13323226	9.5822e-05	4.02		√	2020	13.632	G/A	13323226-13323306	4	qTSW20-A10.1
TSW	A10	rsA10_13323232	13323232	9.5822e-05	4.02		√	2020	13.632	G/C
TSW	A10	rsA10_13323250	13323250	9.5822e-05	4.02		√	2020	13.632	G/A
TSW	A10	rsA10_13323306	13323306	9.7952e-05	4.01		√	2020	13.831	T/C
TSW	C01	rsC01_11383883	11383883	2.669e-05	4.57		√	2020	12.791	T/A	10883883-11883883	1	qTSW20-C1.1
TSW	C02	rsC02_34341238	34341238	4.7477e-06	5.32		√	2020	12.524	A/T	33841238-34841238	1	qTSW20-C2.1
TSW	C03	rsC03_20166823	20166823	4.5885e-06	5.34		√	2020	17.644	A/T	19666823-20666823	1	qTSW20-C3.1
TSW	C07	rsC07_33888857	33888857	3.4097e-06	5.47		√	2020	12.761	T/C	33888857-33888893	3	qTSW20-C7.1
TSW	C07	rsC07_33888858	33888858	3.4097e-06	5.47		√	2020	12.761	C/A
TSW	C07	rsC07_33888893	33888893	7.624e-05	4.12		√	2020	9.449	G/T
SYP	A02	rsA02_6276557	6276557	2.2798e-05	4.64		√	2018	16.377	A/C	5776557-6776557	1	qSYP18-A2.1
SYP	A02	rsA02_22418998	22418998	7.6637e-05	4.12		√	2018	12.8	C/T	21918998-22918998	1	qSYP18-A2.2
SYP	A07	rsA07_696672	696672	3.5818e-06	5.45		√	2018	17.604	C/T	696672-696749	2	qSYP18-A7.1
SYP	A07	rsA07_696749	696749	8.7251e-05	4.06		√	2018	13.44	T/C
SYP	C04	rsC04_9208528	9208528	8.8481e-05	4.05		√	2018	12.624	T/G	8708528-9708528	1	qSYP18-C4.1
SYP	A03	rsA03_22413971	22413971	9.9186e-05	4		√	2019	12.589	G/A	21913971-22913971	1	qSYP19-A3.1
SYP	A07	rsA07_13343093	13343093	1.5463e-05	4.81		√	2019	16.874	C/T	13343093-13343122	5	qSYP19-A7.1
SYP	A07	rsA07_13343094	13343094	7.113e-05	4.15		√	2019	14.877	C/T
SYP	A07	rsA07_13343103	13343103	1.5463e-05	4.81		√	2019	16.874	C/T
SYP	A07	rsA07_13343118	13343118	1.5463e-05	4.81		√	2019	16.874	G/A
SYP	A07	rsA07_13343122	13343122	3.1469e-05	4.5		√	2019	16.093	A/C
SYP	C01	rsC01_20973942	20973942	8.8781e-05	4.05		√	2019	12.759	C/A	20973942-20973951	2	qSYP19-C1.1
SYP	C01	rsC01_20973951	20973951	6.4785e-05	4.19		√	2019	13.096	G/A
SYP	A02	rsA02_7701568	7701568	2.3967e-05	4.62		√	2020	15.462	T/G	7701568-7701673	6	qSYP20-A2.1
SYP	A02	rsA02_7701573	7701573	2.3967e-05	4.62		√	2020	15.462	T/C
SYP	A02	rsA02_7701581	7701581	2.3967e-05	4.62		√	2020	15.462	T/C
SYP	A02	rsA02_7701636	7701636	7.1443e-05	4.15		√	2020	13.995	T/C
SYP	A02	rsA02_7701637	7701637	2.3967e-05	4.62		√	2020	15.462	A/C
SYP	A02	rsA02_7701673	7701673	2.3967e-05	4.62		√	2020	15.462	T/C
SYP	A04	rsA04_8916115	8916115	6.3224e-05	4.2		√	2020	14.513	A/C	8416115-9416115	1	qSYP20-A4.1
SYP	A09	rsA09_24624292	24624292	5.9998e-05	4.22		√	2020	10.426	T/C	24124292-25124292	1	qSYP20-A9.1
DWP	A01	rsA01_2542462	2542462	7.5201e-05	4.12	√		2018	0	A/G	2542462-3150849	5	qDWP18-A1.1
DWP	A01	rsA01_3150792	3150792	4.80586e-06	5.32	√		2018	0	A/G
DWP	A01	rsA01_3150798	3150798	8.18192e-06	5.09	√		2018	0	A/G
DWP	A01	rsA01_3150848	3150848	5.35117e-06	5.27	√		2018	0	G/A
DWP	A01	rsA01_3150849	3150849	9.09524e-06	5.04	√		2018	0	T/A
DWP	A02	rsA02_3336751	3336751	2.14084e-05	4.67	√		2018	0	G/A	2836751-3836751	1	qDWP18-A2.1
DWP	A02	rsA02_4691176	4691176	7.71734e-07	6.11	√		2018	0	G/A	4191176-5191176	1	qDWP18-A2.2	√
DWP	A02	rsA02_20864122	20864122	4.98555e-05	4.3	√		2018	0	C/T	20364122-21364122	1	qDWP18-A2.3
DWP	A06	rsA06_10120437	10120437	9.71782e-05	4.01	√		2018	0	C/T	9620437-10620437	1	qDWP18-A6.1
DWP	A07	rsA07_20278043	20278043	7.62606e-05	4.12	√		2018	0	T/G	20278043-20278046	2	qDWP18-A7.1
DWP	A07	rsA07_20278046	20278046	5.7633e-05	4.24	√		2018	0	C/G
DWP	A08	rsA08_12794769	12794769	1.14222e-05	4.94	√		2018	0	A/G	12794769-12795165	5	qDWP18-A8.1
DWP	A08	rsA08_12794772	12794772	2.00467e-06	5.7/4.29	√	√	2018	13.489	C/A
DWP	A08	rsA08_12795132	12795132	2.19264e-05	4.66	√		2018	0	G/T
DWP	A08	rsA08_12795135	12795135	1.10899e-05	4.96	√		2018	0	G/C
DWP	A08	rsA08_12795165	12795165	1.93849e-05	4.71	√		2018	0	G/A
DWP	A08	rsA08_15608622	15608622	2.45644e-05	4.61	√		2018	0	G/A	15108622-16108622	1	qDWP18-A8.2
DWP	A10	rsA10_13760514	13760514	3.02681e-06	5.52	√		2018	0	T/C	13260514-14260514	1	qDWP18-A10.1
DWP	C01	rsC01_8064246	8064246	7.45124e-05	4.13	√		2018	0	T/C	8064246-8064296	3	qDWP18-C1.1
DWP	C01	rsC01_8064248	8064248	7.45124e-05	4.13	√		2018	0	G/A
DWP	C01	rsC01_8064296	8064296	7.45124e-05	4.13	√		2018	0	T/A
DWP	C02	rsC02_36108930	36108930	5.36578e-05	4.27	√		2018	0	G/A	36108930-36119493	2	qDWP18-C2.1
DWP	C02	rsC02_36119493	36119493	7.7893e-05	4.11	√		2018	0	C/T
DWP	C03	rsC03_1492043	1492043	9.70524e-05	4.01	√		2018	0	C/T	992043-1992043	1	qDWP18-C3.1
DWP	C08	rsC08_11525491	11525491	7.7595e-05	4.11		√	2018	11.959	T/A	11025491-12025491	1	qDWP18-C8.1
DWP	C08	rsC08_16612274	16612274	5.0826e-05	4.29		√	2018	11.459	T/G	16112274-17112274	1	qDWP18-C8.2
DWP	C08	rsC08_22383400	22383400	6.61601e-05	4.18	√		2018	0	G/T	21883400-22883400	1	qDWP18-C8.3
DWP	C09	rsC09_12521248	12521248	1.35665e-05	4.87	√		2018	0	T/C	12521248-12976522	5	qDWP18-C9.1
DWP	C09	rsC09_12521335	12521335	2.51059e-05	4.6	√		2018	0	C/T
DWP	C09	rsC09_12724461	12724461	5.88021e-06	5.23	√		2018	0	C/T
DWP	C09	rsC09_12976490	12976490	5.82607e-06	5.23	√		2018	0	C/T
DWP	C09	rsC09_12976522	12976522	5.72408e-06	5.24	√		2018	0	C/A
DWP	C09	rsC09_42889513	42889513	5.11934e-05	4.29	√		2018	0	A/G	42389513-43389513	1	qDWP18-C9.2
DWP	A02	rsA02_4712591	4712591	7.5292e-05	4.12		√	2019	11.912	C/G	4212591-5212591	1	qDWP19-A2.1	√
DWP	A02	rsA02_13084067	13084067	5.90298e-05	4.23	√		2019	0	T/G	12584067-13584067	1	qDWP19-A2.2
DWP	C01	rsC01_20973951	20973951	6.5079e-05	4.19		√	2019	12.778	C/A	20473951-21473951	1	qDWP19-C1.1
DWP	C03	rsC03_20628877	20628877	4.93421e-05	4.31	√		2019	0	T/C	20628877-20773524	6	qDWP19-C3.1
DWP	C03	rsC03_20628883	20628883	4.93421e-05	4.31	√		2019	0	A/G
DWP	C03	rsC03_20628958	20628958	4.93421e-05	4.31	√		2019	0	G/C
DWP	C03	rsC03_20629256	20629256	1.56497e-05	4.81	√		2019	0	A/G
DWP	C03	rsC03_20644508	20644508	8.51532e-05	4.07	√		2019	0	T/G
DWP	C03	rsC03_20773524	20773524	3.0827e-05	4.51	√		2019	0	T/C
DWP	C04	rsC04_18661866	18661866	3.438e-05	4.46		√	2019	10.971	T/C	18161866-19161866	1	qDWP19-C4.1
DWP	A02	rsA02_7701568	7701568	7.1066e-05	4.15		√	2020	13.791	T/G	7701568-7701673	5	qDWP20-A2.1
DWP	A02	rsA02_7701573	7701573	7.1066e-05	4.15		√	2020	13.791	T/C
DWP	A02	rsA02_7701581	7701581	7.1066e-05	4.15		√	2020	13.791	T/C
DWP	A02	rsA02_7701637	7701637	7.1066e-05	4.15		√	2020	13.791	T/C
DWP	A02	rsA02_7701673	7701673	7.1066e-05	4.15		√	2020	13.791	A/C
DWP	A04	rsA04_1521858	1521858	4.4302e-05	4.35		√	2020	13.643	C/A	1521858-1521941	4	qDWP20-A4.1
DWP	A04	rsA04_1521899	1521899	4.4302e-05	4.35		√	2020	13.643	G/T
DWP	A04	rsA04_1521933	1521933	4.4302e-05	4.35		√	2020	13.643	A/T
DWP	A04	rsA04_1521941	1521941	4.4302e-05	4.35		√	2020	13.643	T/C
DWP	C02	rsC02_30346963	30346963	7.22547e-05	4.14/4.37	√	√	2020	10.87	G/A	29846963-30846963	1	qDWP20-C2.1
DWP	C02	rsC02_42528942	42528942	5.7815e-05	4.24	√		2020	0	T/C	42028942-43028942	1	qDWP20-C2.2
DWP	C03	rsC03_12368340	12368340	5.5888e-05	4.25		√	2020	15.109	T/A	11868340-12868340	1	qDWP20-C3.1
DWP	C07	rsC07_10421463	10421463	7.77512e-05	4.11	√		2020	0	G/A	9921463-10921463	1	qDWP20-C7.1
Repeatable QTL, QTLs repeatedly detected under at least two years; GLM, general linear model; FaST-LMM, factored spectrally transformed linear mixed model; R2 (%), percentage of phenotypic variance explained by each associated marker; SL, silique length; SMI, siliques on main inflorescence; SS, seeds per silique; TSW, thousand seeds weight; SYP, seed yield per plant; DWP, dry weight per plant.

## Sheet: Table S5
Table S5. The pleiotropic QTLs of six yield-related traits in B. napus.
Chromosome	pqQTL	Interval (bp)	Trait	QTL	Interval (bp)	SNP number	Position (bp)
A01	pqA1.1	2293951-3293951	DWP	qDWP18-A1.1	2542462-3150849	5	2542462/3150792/3150798/3150848/3150849/3150849
			SS	qSS18-A1.1	2293951-3293951	1	2793951
	pqA1.2	7840640-8890753	SS	qSS18-A1.3	7840640-8840640	1	8340640
			SL	qSL18-A1.2	7890753-8890753	1	8390753
A02	pqA2.1	1897176-3836751	SMI	qSMI20-A2.2	1897176-2897176	1	2397176
			DWP	qDWP18-A2.1	2836751-3836751	1	3336751
	pqA2.2	7701568-7701673	SYP	qSYP20-A2.1	7701568-7701673	6	7701568/7701573/7701581/7701636/7701637/7701673
			DWP	qDWP20-A2.1	7701568-7701673	5	7701568/7701573/7701581/7701637/7701673
	pqA2.3	10278684-11278708	SS	qSS18-A2.1	10278684-11278684	1	10778684
			SL	qSL19-A2.3	10278708-11278708	1	10778708
	pqA2.4	12099627-13584067	SS	qSS18-A2.2	12099627-13073990	2	12099627/13073990
			DWP	qDWP19-A2.2	12584067-13584067	1	13084067
	pqA2.5	15315024-16578810	SL	qSL18-A2.2	15315024-16315024	1	15815024
			SMI	qSMI19-A2.1	15578810-16578810	1	16078810
	pqA2.6	20364122-22033057	DWP	qDWP18-A2.3	20364122-21364122	1	20864122
			SL	qSL20-A2.2	20970203-22033057	2	20970203/22033057
A03	pqA3.1	14904026-15904026	SL	qSL19-A3.4	14904026-15904026	1	15404026
			TSW	qTSW20-A3.1	15765498-15765534	2	15765498/15765534
	pqA3.2	21872876-22913971	SL	qSL19-A3.5	21872876-22814161	8	21872876/21872947/21935561/21935640/22134974/22135262/22135265/22814161
			SYP	qSYP19-A3.1	21913971-22913971	1	22413971
A04	pqA4.1	4200698-5200698	SL	qSL19-A4.1	4200698-5200698	1	4700698
			TSW	qTSW19-A4.1	4200698-5200698	1	4700698
A05	pqA5.1	18770878-19861804	SS	qSS18-A5.1	18770878-19244991	6	18770878/18770881/18770933/18930935/19242391/19244991
			SMI	qSMI19-A5.2	18861804-19861804	1	19361804
A06	pqA6.1	1312478-2475285	SS	qSS18-A6.1	1418870-2475285	4	1418870/1932961/1932993/2475285
			TSW	qTSW18-A6.1	1312478-2312478	1	1812478
	pqA6.2	9620437-11494517	DWP	qDWP18-A6.1	9620437-10620437	1	10120437
			SMI	qSMI18-A6.1	10494517-11494517	1	10994517
A07	pqA7.1	4742229-6368706	SMI	qSMI20-A7.1	5108419-6368706	3	5108419/5407615/6368706
			SS	qSS18-A7.1	4742229-5742229	1	5242229
	pqA7.2	10185635-11190229	SL	qSL18-A7.2	10185635-11185635	1	10685635
			SS	qSS18-A7.2	10190229-11190229	1	10690229
	pqA7.3	13024811-14024811	SYP	qSYP19-A7.1	13343093-13343122	5	13343093/13343094/13343103/13343118/13343122
			SS	qSS18-A7.3	13024811-14024811	1	13524811
	pqA7.4	19903545-20371096	SL	qSL20-A7.1	19903545-20371096	3	19903545/20371022/20371096
			DWP	qDWP18-A7.1	20278043-20278046	2	20278043/20278046
A08	pqA8.1	1861865-2861865	SS	qSS19-A8.1	1861865-2861865	1	2361865
			TSW	qTSW18-A8.1	2437816-2473777	2	2437816/2473777
	pqA8.2	10341434-11957156	SS	qSS18-A8.2	10495355-10495367	2	10495355/10495367
			TSW	qTSW18-A8.4	10341434-11341434	1	10841434
			SMI	qSMI18-A8.1	10957156-11957156	1	11457156
A09	pqA9.1	12870203-13824672	SL	qSL18-A9.2	12870203-13824672	13
			SMI	qSMI20-A9.1	13790019-13790410	5	13790019/13790048/13790078/13790084/13790410
	pqA9.2	24078912-25528109	SL	qSL18-A9.3	24078912-25048133	2	24078912/25048133
			SYP	qSYP20-A9.1	24124292-25124292	1	24624292
			SMI	qSMI19-A9.1	24528109-25528109	1	25028109
	pqA9.3	27745423-28839525	SL	qSL18-A9.4	27745423-28339525	7	27745423/27928233/27928290/28076545/28076553/28263185/28339525
			SL	qSL19-A9.2	27925698-28703533	2	27925698/28703533
			TSW	qTSW19-A9.1	28050920-28051279	2	28050920/28051279
			SL	qSL20-A9.1	27839525-28839525	1	28339525
A10	pqA10.1	13260514-14260514	TSW	qTSW20-A10.1	13323226-13323306	4	13323226/13323232/13323250/13323306
			DWP	qDWP18-A10.1	13260514-14260514	1	13760514
C01	pqC1.1	20473951-21473951	SYP	qSYP19-C1.1	20973942-20973951	2	20973942/20973951
			DWP	qDWP19-C1.1	20473951-21473951	1	20973951
C02	pqC2.1	33384451-35141980	SMI	qSMI18-C2.1	33384451-34384451	1	33884451
			TSW	qTSW20-C2.1	33841238-34841238	1	34341238
			SL	qSL19-C2.1	34141980-35141980	1	34641980
	pqC2.2	42028942-43816081	DWP	qDWP20-C2.2	42028942-43028942	1	42528942
			SL	qSL18-C2.2	42816081-43816081	1	43316081
C03	pqC3.1	11082756-12868340	SMI	qSMI18-C3.2	11082756-12082756	1	11582756
			DWP	qDWP20-C3.1	11868340-12868340	1	12368340
			SMI	qSMI19-C3.2	12534789-12588274	3	12534789/12587991/12588274
	pqC3.2	33236818-34971704	SL	qSL18-C3.2	33236818-34236818	1	33736818
			SMI	qSMI18-C3.5	33955980-33956002	2	33955980/33956002
			SS	qSS18-C3.1	33971704-34971704	1	34471704
C09	pqC9.1	12405354-13405354	DWP	qDWP18-C9.1	12521248-12976522	5	12521248/12521335/12724461/12976490/12976522
			SS	qSS20-C9.1	12405354-13405354	1	12905354
	pqC9.2	42205111-43389513	SMI	qSMI20-C9.2	42205111-43205111	1	42705111
			DWP	qDWP18-C9.2	42389513-43389513	1	42889513
pqQTL, pleiotropic QTL; SL, silique length; SMI, siliques on main inflorescence; SS, seeds per silique; TSW, thousand seeds weight; SYP, seed yield per plant; DWP, dry weight per plant.

## Sheet: Table S6
Table S6. Comparative genome analysis for salt tolerance traits of present and previous SNPs or QTLs.
Present study						Perious study						Reference
Chromosome	Trait	SNP position (bp)	Rep 1	Rep 2		QTL/SNP	Trait	Chromosome	Position (bp)	SNP number	Distance (kbp)
A02	GV/GR/RSDI	2496879	√	√			leaf area/chlorophyll content (LA/SPAD)	A02	2449329-2514804	3	17.925-47.55	Zhang et al.,2022a
A02	GR	3530820		√			yield (SYP)	A02	3827583-3831544	4	296.763-300.724	Zhang et al.,2022b
							chlorophyll content (SPAD)	A02	3615409-3615411	2	84.589-84.591	Zhang et al.,2022a
							Malondialdehyde content (MDA)	A02	3689136-3689141	4	158.316-158.321	Zhang et al.,2022a
A02	GV/GR	8228124	√	√			plant height (PH)	A02	8015300-8015641	2	212.824-212.483	Zhang et al.,2022b
							leaf area (LA)	A02	8006891-8015262	14	212.862-221.233	Zhang et al.,2022a
						qSTDLA02-2	leaf dry weight (LDW)	A02	8090196-8466214			Hou et al.,2017
A03	GV	16375764	√	√			plant height (PH)	A03	16095760	1	280.004	Zhang et al.,2022b
						qSTR1-b	salt tolerance rank (STR)	A03	13755250-18219314			Lang et al., 2017
							plant height (PH)	A03	16271859-16290849	6	84.915-103.907	Zhang et al.,2022a
A03	GV/GR/RSDI	26172686	√				chlorophyll content (SPAD)	A03	26242977	1	70.291	Zhang et al.,2022a
A03	GV/GR	26173037	√	√
A04	GV	1701171	√				hypocotical length (HL)	A04	1752487	1	51.316	Zhang et al.,2017
							Malondialdehyde content (MDA)	A04	1564538-1630379	4	70.792-136.633	Zhang et al.,2022a
							aboveground dry weight (ADW)	A04	1687219	1	13.952	Zhang et al.,2022a
A05	GV/GR/RSDI	1728617	√	√			shoot length (SL)	A05	1887184	1	158.57	Wan et al.,2017
A05	GV/GR	3162995/3343343/3343351	√	√			plant height (PH)	A05	3198868-3206046	3	35.873-43.051	Zhang et al.,2022a
							relative electrical conductivity (REC)	A05	3229394	1	66.399	Zhang et al.,2022a
A05	GV/GR	5280751	√	√			chlorophyll content (SPAD)	A05	5204523-5238557	6	42.194-76.228	Zhang et al.,2022a
							shoot dry weight (SDW)	A05	5041435-5041723	2	239.028-239.316	Wassan et al 2021
A05	GV/GR/RSDI	6670181/6692257/6692275	√	√			root length/chlorophyll content (RL/SPAD)	A05	6566442-6605586	3	64.595-103.739	Zhang et al.,2022a
							chlorophyll content (SPAD)	A05	6676787-6771332	2	6.606-101.151	Zhang et al.,2022a
A05	GV/GR/RSDI	16051518	√	√			plant height (PH)	A05	15826973-15837879	4	213.639-224.545	Zhang et al.,2022b
A05	GV	17682405	√	√			leaf area (LA)	A05	17654788	1	27.617	Zhang et al.,2022a
A06	GR	22471588	√	√		qRFWa-A6	root fresh weight (RFW)	A06	21488598-22686921			Unpublish
A06	GR	22471644	√	√
A06	GV	20144629	√				chlorophyll content (SPAD)	A06	20013939	1	130.69	Zhang et al.,2022a
A07	RSDI	19459527/19459628		√			root length (RL)	A07	19491505	1	31.978	He et al.,2017
							root length (RL)	A07	19310174	1	149.353	Zhang et al.,2017
							chlorophyll content (SPAD)	A07	19365615-19531877	25	12.107-93.912	Zhang et al.,2022a
A09	GR	31840807		√			Malondialdehyde content (MDA)	A09	31998625-31999643	3	157.818-158.836	Zhang et al.,2022a
A10	GV/GR/RSDI	15188859	√	√		BnvaA1015188859	ground dry weight/plant height/yield (GDW/PH/SYP)	A10	15188859	1	0	Zhang et al.,2022b
A10	RSDI	15189187	√	√		BnvaA1015189187	plant height (PH)	A10	15189187	1	0	Zhang et al.,2022b
A10	RSDI	15189200	√	√		BnvaA1015189200	plant height (PH)	A10	15189200	1	0	Zhang et al.,2022b
A10	RSDI	15189284	√	√		BnvaA1015189284	plant height (PH)	A10	15189284	1	0	Zhang et al.,2022b
C01	GV	14634279	√	√			chlorophyll content (SPAD)	C01	14586118	1	48.161	Zhang et al.,2022a
C03	GR/RSDI	13384422/13384442		√			relative electrical conductivity (REC)	C03	13257818	1	126.604	Zhang et al.,2022a
							chlorophyll content (SPAD)	C03	13262496	1	121.946	Zhang et al.,2022a
C04	RSDI	5933538/5933539/5933579/5933820		√			shoot length (SL)	C04	5694092-5704431	2	229.389-239.728	Wan et al.,2017
							chlorophyll content (SPAD)	C04	6004868	1	71.048	Zhang et al.,2022a
C04	GV	8071480		√			leaf area (LA)	C04	8133623-8133626	3	62.143-62.146	Zhang et al.,2022a
C05	GV/GR/RSDI	41484371		√			chlorophyll content (SPAD)	C05	41624811	1	140.44	Zhang et al.,2022a
C08	GV	31802916		√			chlorophyll content (SPAD)	C08	31703062-31703069	2	99.847-99.854	Zhang et al.,2022a
C08	GV/GR/RSDI	35846448	√	√			leaf area (LA)	C08	35807445-35811625	7	34.823-38.774	Zhang et al.,2022a
							plant height (PH)	C08	35707418	1	139.03	Zhang et al.,2022b
							hypocotical length (HL)	C08	35812498	1	33.95	Zhang et al.,2017
C08	GR/RSDI	38115759	√	√			leaf area (LA)	C08	38170311-38188065	8	54.552-72.306	Zhang et al.,2022a
C09	GV/GR/RSDI	34383182	√	√			Malondialdehyde content (MDA)	C09	34335540	1	47.642	Zhang et al.,2022a
Distance (kbp), the distance between the SNP of present study and the SNP of previous study; Rep1/2, two biological replicates; GV, germination vigor; GR, germination rate; RSDI, relative salt damage index.

## Sheet: Table S7
Table S7. Comparative genome analysis for six yield-related traits of present and previous SNPs or QTLs.
Trait	Present study						Perious study
	QTL	Start-end (bp)	SNP number	pqQTL	Start-end (bp)		QTL	Chromosome	Start-end (bp)	SNP number	Reference
SL	qSL19-A2.3	10278708-11278708	1	pqA2.3	10278684-11278708		rs.A02.11025788	A02	11025788		Dong et al 2018
	qSL19-A6.1	23469352-24469352	1				cqSL-A6-4	A06	23217502-24217502		Wang et al. 2016
	qSL20-A7.1	19903545-20371096	3	pqA7.4	19903545-20371096			A07	19989673-20366957	188	Dong et al 2018
	qSL18-A9.2	12870203-13824672	13					A09	12872271-12949850	7	Dong et al 2018
	qSL18-A9.4	27745423-28339525	7	pqA9.3	27745423-28839525		qSL_RR_A09b	A09	27577590-28622867		Wang et al 2019
	qSL19-A9.2	27925698-28703533	2				qSL_ZR_A09	A09	28619958-28994184		Wang et al 2019
	qSL20-A9.1	27839525-28839525	1				qSL9-1(DH)	A09	27128147-28128147		Fu et al. 2015
							qSL9-1(RC-F2)	A09	27128147-28128147		Fu et al. 2015
							qSL9-2(RC-F2)	A09	27128147-28128147		Fu et al. 2015
								A09	27783615-28572515	10	Hu et al. 2022
								A09	27782841-28612997	279	Dong et al 2018
	qSL18-A9.5	29457791-30457791	1				EA05MC08_1	A09	29608603		Cai et al 2014
							BrGMS1039	A09	29998693		Cai et al 2014
							BrGMS1040	A09	30042496		Cai et al 2014
	qSL19-C1.1	3039337-4039337	1					C01	3750581-3782227	16	Dong et al 2018
	qSL19-C8.3	24745353-25745353	1				pW104cH	C08	25533899		Udall et al. 2006
							ln18.5	C08	25534228-26534228		Udall et al. 2006
	qSL20-C8.1	29736940-30736940	1					C08	30729143		Hu et al. 2022
SS	qSS18-A1.1	2293951-3293951	1	pqA1.1	2293951-3293951		qSN003	A01	1988287-2988287		Shi et al. 2009
							qSN004	A01	1988287-2988287		Shi et al. 2009
							DHqSN03	A01	1988287-2988287		Shi et al. 2011
	qSS18-A1.3	7840640-8840640	1	pqA1.2	7840640-8890753		qSNA1	A01	8237845-9237845		Qi et al. 2014
	qSS18-A1.4	22024676-23024676	1				cqSPS-A1	A01	21031699-22031699		Wang et al. 2016
	qSS18-A2.1	10278684-11278684	1	pqA2.3	10278684-11278708		qSN.A2-1	A02	10788452		Luo et al 2017
	qSS18-A3.1	16386848-17386848	1				qSN020	A03	16137436		Shi et al. 2009
	qSS18-A7.1	4742229-5742229	1	pqA7.1	4742229-6368706		qSN034	A07	5219984-6219984		Shi et al. 2009
SMI	qSMI20-A2.2	1897176-2897176	1					A02	2379412		Hu et al. 2022
							cqPMI-A2-2	A02	2154249-3154249		Zhao et al. 2016
	qSMI18-A4.1	10331520-11331520	1					A04	11290904		Hu et al. 2022
TSW	qTSW20-A3.1	15765498-15765534	2	pqA3.1	14904026-15904026		qSW024	A03	14776084-15776084		Shi et al. 2009
	qTSW19-A4.1	4200698-5200698	1	pqA4.1	4200698-5200698		qSW035	A04	4245747		Shi et al. 2009
							qSW040	A04	4115367-5115367		Shi et al. 2009
							qSW035	A04	4245747-5245747		Shi et al. 2009
	qTSW18-A6.1	1312478-2312478	1	pqA6.1	1312478-2475285		qSW.A6-3	A06	1675587		Luo et al 2017
							qSW.A6-4	A06	1675587		Luo et al 2017
							qSW.A6-5	A06	2213679		Luo et al 2017
	qTSW18-A8.2	4471917-5471917	1					A08	5385347		Hu et al. 2022
	qTSW20-A9.1	5080719-6080719	1				TH-tsm07	A09	5372137-6372137		Basunanda et al. 2010
	qTSW19-A9.1	28050920-28051279	2	pqA9.3	27745423-28839525		qSW9-2(DH)	A09	27128147-28128147		Fu et al. 2015
							qSW9-2(RC-F2)	A09	27128147-28128147		Fu et al. 2015
							qSW9-3(RC-F2)	A09	27128147-28128147		Fu et al. 2015
								A09	27994474-28142522	9	Hu et al. 2022
							rs.A09.28116249	A09	28016249-28216249		Dong et al 2018
SYP	qSYP20-A2.1	7701568-7701673	6	pqA2.2	7701568-7701673		cqSY-A2-1	A02	7138065-8138065		Zhao et al. 2016
	qSYP19-C1.1	20973942-20973951	2	pqC1.1	20473951-21473951		sy11.1	C01	20232590-21232590		Quijada et al. 2006
DWP	qDWP18-A7.1	20278043-20278046	2	pqA7.4	19903545-20371096		cqBY-A7-2	A07	19789340-20789340		Zhao et al. 2016
pqQTL, pleiotropic QTL; SL, silique length; SMI, siliques on main inflorescence; SS, seeds per silique; TSW, thousand seeds weight; SYP, seed yield per plant; DWP, dry weight per plant.

## Sheet: Table S8
Table S8. Genes associated with 36 significant SNPs for the three salt tolerance traits in B. napus.
Trait	Model	Chromosome	Position (bp)	Allele	Gene ID	Site_strat (bp)	Site_end (bp)	Distance (bp)
GV	FaST-LMM	A03	16375764	A/G	BnaA03g33930D	16433475	16434855	5'_57711
GV	FaST-LMM	A03	16375764	A/G	BnaA03g33920D	16424329	16424652	5'_48565
GV	FaST-LMM	A03	16375764	A/G	BnaA03g33910D	16422961	16424243	5'_47197
GV	FaST-LMM	A03	16375764	A/G	BnaA03g33900D	16413599	16413733	5'_37835
GV	FaST-LMM	A03	16375764	A/G	BnaA03g33890D	16409029	16410113	5'_33265
GV	FaST-LMM	A03	16375764	A/G	BnaA03g33880D	16402195	16403924	3'_26431
GV	FaST-LMM	A03	16375764	A/G	BnaA03g33870D	16397274	16401806	5'_21510
GV	FaST-LMM	A03	16375764	A/G	BnaA03g33860D	16394807	16396335	3'_19043
GV	FaST-LMM	A03	16375764	A/G	BnaA03g33850D	16390835	16392056	5'_15071
GV	FaST-LMM	A03	16375764	A/G	BnaA03g33840D	16385387	16386409	5'_9623
GV	FaST-LMM	A03	16375764	A/G	BnaA03g33830D	16381699	16382909	5'_5935
GV	FaST-LMM	A03	16375764	A/G	BnaA03g33820D	16378799	16381250	5'_3035
GV	FaST-LMM	A03	16375764	A/G	BnaA03g33810D	16371962	16375940	--
GV	FaST-LMM	A03	16375764	A/G	BnaA03g33800D	16367225	16370497	3'_5267
GV	FaST-LMM	A03	16375764	A/G	BnaA03g33790D	16358258	16359218	3'_16546
GV	FaST-LMM	A03	16375764	A/G	BnaA03g33780D	16354049	16355212	3'_20552
GV	FaST-LMM	A03	16375764	A/G	BnaA03g33770D	16351813	16353433	3'_22331
GV	FaST-LMM	A03	16375764	A/G	BnaA03g33760D	16346270	16349508	3'_26256
GV	FaST-LMM	A03	16375764	A/G	BnaA03g33750D	16343815	16345869	5'_29895
GV	FaST-LMM	A03	16375764	A/G	BnaA03g33740D	16335589	16341954	5'_33810
GV	FaST-LMM	A03	16375764	A/G	BnaA03g33730D	16333106	16335170	3'_40594
GV	FaST-LMM	A03	16375764	A/G	BnaA03g33720D	16331747	16332163	3'_43601
GV	FaST-LMM	A03	16375764	A/G	BnaA03g33710D	16328719	16330997	5'_44767
GV	FaST-LMM	A03	16375764	A/G	BnaA03g33700D	16327693	16328656	3'_47108
GV	FaST-LMM	A03	16375764	A/G	BnaA03g33690D	16321141	16321818	5'_53946
GV	FaST-LMM	A03	16375764	A/G	BnaA03g33680D	16317560	16319646	3'_56118
GV	FaST-LMM	A03	16375764	A/G	BnaA03g33670D	16309100	16310974	3'_64790
GV	FaST-LMM	A03	16375764	A/G	BnaA03g33660D	16305868	16308364	3'_67400
GV	FaST-LMM	A03	16375764	A/G	BnaA03g33650D	16301210	16303561	5'_72203
GV	FaST-LMM	A03	16375764	A/G	BnaA03g33640D	16296098	16301133	3'_74631
GV	FaST-LMM	A03	16375764	A/G	BnaA03g33630D	16290276	16292096	3'_83668
GV	FaST-LMM	A03	16375764	A/G	BnaA03g33620D	16286131	16289457	3'_86307
GV	FaST-LMM	A03	16375764	A/G	BnaA03g33610D	16284061	16285570	3'_90194
GV	FaST-LMM	A03	16375764	A/G	BnaA03g33600D	16278348	16280767	5'_94997
GV	FaST-LMM	A03	16375764	A/G	BnaA03g33590D	16276680	16278104	3'_97660
GV	FaST-LMM	A03	16375764	A/G	BnaA03g33580D	16275939	16276603	3'_99161
GV	GLM	A05	17682405	A/G	BnaA05g23520D	17777418	17781394	3'_95013
GV	GLM	A05	17682405	A/G	BnaA05g23510D	17773011	17776884	5'_90606
GV	GLM	A05	17682405	A/G	BnaA05g23500D	17767488	17768974	5'_85083
GV	GLM	A05	17682405	A/G	BnaA05g23490D	17765017	17767369	5'_82612
GV	GLM	A05	17682405	A/G	BnaA05g23480D	17762477	17762632	5'_80072
GV	GLM	A05	17682405	A/G	BnaA05g23470D	17761539	17762369	5'_79134
GV	GLM	A05	17682405	A/G	BnaA05g23460D	17750143	17751914	3'_67738
GV	GLM	A05	17682405	A/G	BnaA05g23450D	17748720	17750089	5'_66315
GV	GLM	A05	17682405	A/G	BnaA05g23440D	17743383	17747601	3'_60978
GV	GLM	A05	17682405	A/G	BnaA05g23430D	17738280	17742075	3'_55875
GV	GLM	A05	17682405	A/G	BnaA05g23420D	17736129	17736851	3'_53724
GV	GLM	A05	17682405	A/G	BnaA05g23410D	17730293	17734247	5'_47888
GV	GLM	A05	17682405	A/G	BnaA05g23400D	17725468	17729082	5'_43063
GV	GLM	A05	17682405	A/G	BnaA05g23390D	17721090	17725404	3'_38685
GV	GLM	A05	17682405	A/G	BnaA05g23380D	17719786	17720409	3'_37381
GV	GLM	A05	17682405	A/G	BnaA05g23370D	17712021	17712559	3'_29616
GV	GLM	A05	17682405	A/G	BnaA05g23360D	17685753	17693294	3'_3348
GV	GLM	A05	17682405	A/G	BnaA05g23350D	17683715	17684062	5'_1310
GV	GLM	A05	17682405	A/G	BnaA05g23340D	17655954	17658255	5'_24150
GV	GLM	A05	17682405	A/G	BnaA05g23330D	17644919	17649313	5'_33092
GV	GLM	A05	17682405	A/G	BnaA05g23320D	17634576	17637897	5'_44508
GV	GLM	A05	17682405	A/G	BnaA05g23310D	17631048	17632754	3'_49651
GV	GLM	A05	17682405	A/G	BnaA05g23300D	17617660	17619557	3'_62848
GV	GLM	A05	17682405	A/G	BnaA05g23290D	17612904	17615420	3'_66985
GV	GLM	A05	17682405	A/G	BnaA05g23280D	17608886	17611590	3'_70815
GV	GLM	A05	17682405	A/G	BnaA05g23270D	17602931	17606019	3'_76386
GV	GLM	A05	17682405	A/G	BnaA05g23260D	17600952	17601335	5'_81070
GV	GLM	A05	17682405	A/G	BnaA05g23250D	17598102	17598825	3'_83580
GV	GLM	A05	17682405	A/G	BnaA05g23240D	17595257	17596423	3'_85982
GV	GLM	A05	17682405	A/G	BnaA05g23230D	17593329	17595189	3'_87216
GV	GLM	A05	17682405	A/G	BnaA05g23220D	17592995	17593231	3'_89174
GV	GLM	A05	17682405	A/G	BnaA05g23210D	17584830	17590068	3'_92337
GV	GLM	A05	17682405	A/G	BnaA05g23200D	17579844	17584424	3'_97981
GV	GLM	A09	13997974, 13997990	G/A	BnaA09g21190D	13895250	13902764	3'_95210
GV	GLM	A09	13997974, 13997990	G/A	BnaA09g21200D	13903561	13910991	5'_86983
GV	GLM	A09	13997974, 13997990	G/A	BnaA09g21210D	13916779	13917093	3'_80881
GV	GLM	A09	13997974, 13997990	G/A	BnaA09g21220D	13925803	13930081	3'_67893
GV	GLM	A09	13997974, 13997990	G/A	BnaA09g21230D	13931276	13933935	3'_64039
GV	GLM	A09	13997974, 13997990	G/A	BnaA09g21240D	13946608	13949847	3'_48127
GV	GLM	A09	13997974, 13997990	G/A	BnaA09g21250D	13950452	13951923	3'_46051
GV	GLM	A09	13997974, 13997990	G/A	BnaA09g21260D	13953144	13954085	3'_43889
GV	GLM	A09	13997974, 13997990	G/A	BnaA09g21270D	13956098	13958796	3'_39178
GV	GLM	A09	13997974, 13997990	G/A	BnaA09g21280D	13965533	13969657	5'_28317
GV	GLM	A09	13997974, 13997990	G/A	BnaA09g21290D	14003940	14004350	5'_5966
GV	GLM	A09	13997974, 13997990	G/A	BnaA09g21300D	14005842	14007125	5'_7868
GV	GLM	A09	13997974, 13997990	G/A	BnaA09g21310D	14024115	14027655	5'_26141
GV	GLM	A09	13997974, 13997990	G/A	BnaA09g21320D	14049501	14053495	5'_51527
GV	GLM	A09	13997974, 13997990	G/A	BnaA09g21330D	14059418	14062587	5'_61444
GV	GLM	A09	13997974, 13997990	G/A	BnaA09g21340D	14063324	14066293	3'_65350
GV	GLM	A09	13997974, 13997990	G/A	BnaA09g21350D	14072701	14077273	5'_74727
GV	GLM	A09	13997974, 13997990	G/A	BnaA09g21360D	14077396	14078565	3'_79422
GV	GLM	A09	13997974, 13997990	G/A	BnaA09g21370D	14079559	14080439	5'_81585
GV	GLM	A09	13997974, 13997990	G/A	BnaA09g21380D	14080653	14083067	3'_82679
GV	GLM	A09	13997974, 13997990	G/A	BnaA09g21390D	14092377	14092529	3'_94403
GV	GLM	C01	14634279	T/G	BnaC01g21030D	14704922	14705245	5'_70643
GV	GLM	C01	14634279	T/G	BnaC01g21020D	14701045	14701149	5'_66766
GV	GLM	C01	14634279	T/G	BnaC01g21010D	14698673	14700541	5'_64394
GV	GLM	C01	14634279	T/G	BnaC01g21000D	14680125	14682435	3'_45846
GV	GLM	C01	14634279	T/G	BnaC01g20990D	14669791	14670198	5'_35512
GV	GLM	C01	14634279	T/G	BnaC01g20980D	14641816	14643912	5'_7537
GV	GLM	C01	14634279	T/G	BnaC01g20970D	14639629	14641595	5'_5350
GV	GLM	C01	14634279	T/G	BnaC01g20960D	14638051	14639322	5'_3772
GV	GLM	C01	14634279	T/G	BnaC01g20950D	14610971	14611407	3'_22872
GV	GLM	C01	14634279	T/G	BnaC01g20940D	14608293	14609465	5'_24814
GV	GLM	C01	14634279	T/G	BnaC01g21040D	14720471	14721376	5'_86192
GV	GLM	C01	14634279	T/G	BnaC01g21050D	14730891	14733748	3'_96612
GV	GLM	C01	14634279	T/G	BnaC01g20930D	14606217	14607183	5'_27096
GV	GLM	C01	14634279	T/G	BnaC01g20920D	14592754	14593535	5'_40744
GV	GLM	C01	14634279	T/G	BnaC01g20910D	14592123	14592695	5'_41584
GV	GLM	C01	14634279	T/G	BnaC01g20900D	14589115	14589490	3'_44789
GV	GLM	C01	14634279	T/G	BnaC01g20890D	14587437	14588861	3'_45418
GV	GLM	C01	14634279	T/G	BnaC01g20880D	14571037	14572139	5'_62140
GV	GLM	C01	14634279	T/G	BnaC01g20870D	14550869	14551124	5'_83155
GV	GLM	C01	14634279	T/G	BnaC01g20860D	14550326	14550802	5'_83477
GV	GLM	C01	14634279	T/G	BnaC01g20850D	14542664	14544564	5'_89715
GV	GLM	C01	14634279	T/G	BnaC01g20840D	14542015	14542569	3'_91710
GV	GLM	C01	14634279	T/G	BnaC01g20830D	14539562	14541693	3'_92586
GV	GLM	C01	14634279	T/G	BnaC01g20820D	14537110	14537794	5'_96485
GV	GLM	C01	14634279	T/G	BnaC01g20810D	14535976	14536899	3'_97380
GV	FaST-LMM	C05	31987934, 31987857	G/A	BnaC05g32380D	32014877	32017278	3'_26943
GV	FaST-LMM	C05	31987934, 31987857	G/A	BnaC05g32370D	32012874	32014479	3'_24940
GV	FaST-LMM	C05	31987934, 31987857	G/A	BnaC05g32360D	32006507	32011137	3'_18573
GV	FaST-LMM	C05	31987934, 31987857	G/A	BnaC05g32350D	32005018	32005891	3'_17084
GV	FaST-LMM	C05	31987934, 31987857	G/A	BnaC05g32340D	32001376	32001602	5'_13442
GV	FaST-LMM	C05	31987934, 31987857	G/A	BnaC05g32330D	31999291	31999929	3'_11357
GV	FaST-LMM	C05	31987934, 31987857	G/A	BnaC05g32320D	31992338	31996734	3'_4404
GV	FaST-LMM	C05	31987934, 31987857	G/A	BnaC05g32310D	31991538	31992251	5'_3604
GV	FaST-LMM	C05	31987934, 31987857	G/A	BnaC05g32300D	31978221	31978617	5'_9317
GV	FaST-LMM	C05	31987934, 31987857	G/A	BnaC05g32290D	31978005	31978094	5'_9840
GV	FaST-LMM	C05	31987934, 31987857	G/A	BnaC05g32280D	31969746	31970262	5'_17672
GV	FaST-LMM	C05	31987934, 31987857	G/A	BnaC05g32270D	31966013	31967431	3'_20503
GV	FaST-LMM	C05	31987934, 31987857	G/A	BnaC05g32260D	31960146	31960458	3'_27476
GV	FaST-LMM	C05	31987934, 31987857	G/A	BnaC05g32250D	31933504	31936332	3'_51602
GV	FaST-LMM	C05	31987934, 31987857	G/A	BnaC05g32240D	31924548	31929813	3'_58121
GV	FaST-LMM	C05	31987934, 31987857	G/A	BnaC05g32230D	31921042	31922750	3'_65184
GV	FaST-LMM	C05	31987934, 31987857	G/A	BnaC05g32220D	31907484	31910336	3'_77598
GV	FaST-LMM	C05	31987934, 31987857	G/A	BnaC05g32390D	32024463	32026081	3'_36529
GV	FaST-LMM	C05	31987934, 31987857	G/A	BnaC05g32400D	32031909	32032553	3'_43975
GV	FaST-LMM	C05	31987934, 31987857	G/A	BnaC05g32410D	32033022	32035870	5'_45088
GV	FaST-LMM	C05	31987934, 31987857	G/A	BnaC05g32420D	32040487	32040782	3'_52553
GV	FaST-LMM	C05	31987934, 31987857	G/A	BnaC05g32430D	32040837	32044785	3'_52903
GV	FaST-LMM	C05	31987934, 31987857	G/A	BnaC05g32440D	32044840	32044956	3'_56906
GV	FaST-LMM	C05	31987934, 31987857	G/A	BnaC05g32450D	32046004	32046460	3'_58070
GV	FaST-LMM	C05	31987934, 31987857	G/A	BnaC05g32460D	32046545	32046637	3'_58611
GV	FaST-LMM	C05	31987934, 31987857	G/A	BnaC05g32470D	32053075	32054714	5'_65141
GV	FaST-LMM	C05	31987934, 31987857	G/A	BnaC05g32480D	32054915	32058961	5'_66981
GV	FaST-LMM	C05	31987934, 31987857	G/A	BnaC05g32490D	32059943	32063003	3'_72009
GV	FaST-LMM	C05	31987934, 31987857	G/A	BnaC05g32500D	32066461	32070364	5'_78527
GV	FaST-LMM	C05	31987934, 31987857	G/A	BnaC05g32510D	32087816	32089433	5'_99882
GV	FaST-LMM	C06	33843164, 33843483,33843558	C/G	BnaC06g34140D	33742763	33744265	5'_98899
GV	FaST-LMM	C06	33843164, 33843483,33843558	C/G	BnaC06g34150D	33744636	33746865	5'_96299
GV	FaST-LMM	C06	33843164, 33843483,33843558	C/G	BnaC06g34160D	33747668	33749126	5'_94038
GV	FaST-LMM	C06	33843164, 33843483,33843558	C/G	BnaC06g34170D	33749689	33750297	5'_92867
GV	FaST-LMM	C06	33843164, 33843483,33843558	C/G	BnaC06g34180D	33750776	33751642	5'_91522
GV	FaST-LMM	C06	33843164, 33843483,33843558	C/G	BnaC06g34190D	33753528	33754163	5'_89001
GV	FaST-LMM	C06	33843164, 33843483,33843558	C/G	BnaC06g34200D	33762705	33763322	5'_79842
GV	FaST-LMM	C06	33843164, 33843483,33843558	C/G	BnaC06g34210D	33770752	33771548	5'_71616
GV	FaST-LMM	C06	33843164, 33843483,33843558	C/G	BnaC06g34220D	33772942	33773469	5'_69695
GV	FaST-LMM	C06	33843164, 33843483,33843558	C/G	BnaC06g34230D	33776327	33778726	3'_64438
GV	FaST-LMM	C06	33843164, 33843483,33843558	C/G	BnaC06g34240D	33779897	33781655	3'_61509
GV	FaST-LMM	C06	33843164, 33843483,33843558	C/G	BnaC06g34250D	33790567	33793062	5'_50102
GV	FaST-LMM	C06	33843164, 33843483,33843558	C/G	BnaC06g34260D	33802674	33805381	5'_37783
GV	FaST-LMM	C06	33843164, 33843483,33843558	C/G	BnaC06g34270D	33806270	33807935	5'_35229
GV	FaST-LMM	C06	33843164, 33843483,33843558	C/G	BnaC06g34280D	33820800	33821458	5'_21706
GV	FaST-LMM	C06	33843164, 33843483,33843558	C/G	BnaC06g34290D	33830023	33830700	5'_12464
GV	FaST-LMM	C06	33843164, 33843483,33843558	C/G	BnaC06g34300D	33832125	33834203	3'_8961
GV	FaST-LMM	C06	33843164, 33843483,33843558	C/G	BnaC06g34310D	33834633	33835249	5'_7915
GV	FaST-LMM	C06	33843164, 33843483,33843558	C/G	BnaC06g34320D	33836579	33840540	5'_2624
GV	FaST-LMM	C06	33843164, 33843483,33843558	C/G	BnaC06g34330D	33842717	33846412	--
GV	FaST-LMM	C06	33843164, 33843483,33843558	C/G	BnaC06g34340D	33847372	33851026	3'_4208
GV	FaST-LMM	C06	33843164, 33843483,33843558	C/G	BnaC06g34350D	33858683	33860332	5'_15519
GV	FaST-LMM	C06	33843164, 33843483,33843558	C/G	BnaC06g34360D	33862660	33864221	5'_19496
GV	FaST-LMM	C06	33843164, 33843483,33843558	C/G	BnaC06g34370D	33865839	33872300	5'_22675
GV	FaST-LMM	C06	33843164, 33843483,33843558	C/G	BnaC06g34380D	33873350	33878335	5'_30186
GV	FaST-LMM	C06	33843164, 33843483,33843558	C/G	BnaC06g34390D	33889902	33892488	5'_46738
GV	FaST-LMM	C06	33843164, 33843483,33843558	C/G	BnaC06g34400D	33900899	33901686	5'_57735
GV	FaST-LMM	C06	33843164, 33843483,33843558	C/G	BnaC06g34410D	33907407	33907622	3'_64243
GV	FaST-LMM	C06	33843164, 33843483,33843558	C/G	BnaC06g34420D	33917036	33918547	5'_73872
GV	FaST-LMM	C06	33843164, 33843483,33843558	C/G	BnaC06g34430D	33919987	33921179	5'_76823
GV	FaST-LMM	C06	33843164, 33843483,33843558	C/G	BnaC06g34440D	33922586	33923439	5'_79422
GV	FaST-LMM	C06	33843164, 33843483,33843558	C/G	BnaC06g34450D	33925956	33927420	5'_82792
GV	FaST-LMM	C06	33843164, 33843483,33843558	C/G	BnaC06g34460D	33927476	33929366	3'_84312
GV	FaST-LMM	C06	33843164, 33843483,33843558	C/G	BnaC06g34470D	33929460	33934599	3'_86296
GV	FaST-LMM	C06	33843164, 33843483,33843558	C/G	BnaC06g34480D	33942862	33946041	3'_99698
GR	FaST-LMM	A06	22471588, 22471644	A/G	BnaA06g34110D	22565742	22570428	3'_94154
GR	FaST-LMM	A06	22471588, 22471644	A/G	BnaA06g33730D	22371521	22373837	3'_97751
GR	FaST-LMM	A06	22471588, 22471644	A/G	BnaA06g33740D	22376021	22377524	5'_94064
GR	FaST-LMM	A06	22471588, 22471644	A/G	BnaA06g33750D	22381122	22384376	3'_87212
GR	FaST-LMM	A06	22471588, 22471644	A/G	BnaA06g33760D	22384465	22386423	5'_85165
GR	FaST-LMM	A06	22471588, 22471644	A/G	BnaA06g33770D	22386602	22387424	3'_84164
GR	FaST-LMM	A06	22471588, 22471644	A/G	BnaA06g33780D	22388563	22393319	3'_78269
GR	FaST-LMM	A06	22471588, 22471644	A/G	BnaA06g33790D	22409029	22413224	3'_58364
GR	FaST-LMM	A06	22471588, 22471644	A/G	BnaA06g33800D	22414049	22416153	3'_55435
GR	FaST-LMM	A06	22471588, 22471644	A/G	BnaA06g33810D	22416253	22418154	3'_53434
GR	FaST-LMM	A06	22471588, 22471644	A/G	BnaA06g33820D	22418599	22419984	3'_51604
GR	FaST-LMM	A06	22471588, 22471644	A/G	BnaA06g33830D	22421795	22424461	5'_47127
GR	FaST-LMM	A06	22471588, 22471644	A/G	BnaA06g33840D	22425279	22427489	5'_44099
GR	FaST-LMM	A06	22471588, 22471644	A/G	BnaA06g33850D	22436441	22438022	3'_33566
GR	FaST-LMM	A06	22471588, 22471644	A/G	BnaA06g33860D	22440343	22441554	5'_30034
GR	FaST-LMM	A06	22471588, 22471644	A/G	BnaA06g33870D	22442662	22445570	5'_26018
GR	FaST-LMM	A06	22471588, 22471644	A/G	BnaA06g33880D	22446550	22447630	3'_23958
GR	FaST-LMM	A06	22471588, 22471644	A/G	BnaA06g33890D	22448176	22449149	3'_22439
GR	FaST-LMM	A06	22471588, 22471644	A/G	BnaA06g33900D	22449535	22450687	5'_20901
GR	FaST-LMM	A06	22471588, 22471644	A/G	BnaA06g33910D	22452631	22455755	3'_15833
GR	FaST-LMM	A06	22471588, 22471644	A/G	BnaA06g33920D	22456555	22458722	3'_12866
GR	FaST-LMM	A06	22471588, 22471644	A/G	BnaA06g33930D	22460781	22462081	3'_9507
GR	FaST-LMM	A06	22471588, 22471644	A/G	BnaA06g33940D	22470515	22472723	--
GR	FaST-LMM	A06	22471588, 22471644	A/G	BnaA06g33950D	22479156	22480144	3'_7568
GR	FaST-LMM	A06	22471588, 22471644	A/G	BnaA06g33960D	22480871	22484422	5'_9283
GR	FaST-LMM	A06	22471588, 22471644	A/G	BnaA06g33970D	22490437	22491055	5'_18849
GR	FaST-LMM	A06	22471588, 22471644	A/G	BnaA06g33980D	22499656	22501958	3'_28068
GR	FaST-LMM	A06	22471588, 22471644	A/G	BnaA06g33990D	22513737	22516788	5'_42149
GR	FaST-LMM	A06	22471588, 22471644	A/G	BnaA06g34000D	22519243	22521580	5'_47655
GR	FaST-LMM	A06	22471588, 22471644	A/G	BnaA06g34010D	22521744	22524734	3'_50156
GR	FaST-LMM	A06	22471588, 22471644	A/G	BnaA06g34020D	22529284	22531460	5'_57696
GR	FaST-LMM	A06	22471588, 22471644	A/G	BnaA06g34030D	22531509	22533023	3'_59921
GR	FaST-LMM	A06	22471588, 22471644	A/G	BnaA06g34040D	22533563	22535203	3'_61975
GR	FaST-LMM	A06	22471588, 22471644	A/G	BnaA06g34050D	22537174	22539089	5'_65586
GR	FaST-LMM	A06	22471588, 22471644	A/G	BnaA06g34060D	22539406	22541687	3'_67818
GR	FaST-LMM	A06	22471588, 22471644	A/G	BnaA06g34070D	22544150	22546567	5'_72562
GR	FaST-LMM	A06	22471588, 22471644	A/G	BnaA06g34080D	22546951	22548372	3'_75363
GR	FaST-LMM	A06	22471588, 22471644	A/G	BnaA06g34090D	22548574	22551030	5'_76986
GR	FaST-LMM	A06	22471588, 22471644	A/G	BnaA06g34100D	22551497	22558918	3'_79909
GV/GR	FaST-LMM	A02	8228124	A/T	BnaA02g14410D	8128787	8130586	3'_97538
GV/GR	FaST-LMM	A02	8228124	A/T	BnaA02g14420D	8139643	8140290	3'_87834
GV/GR	FaST-LMM	A02	8228124	A/T	BnaA02g14430D	8145750	8146517	3'_81607
GV/GR	FaST-LMM	A02	8228124	A/T	BnaA02g14440D	8153465	8156150	3'_71974
GV/GR	FaST-LMM	A02	8228124	A/T	BnaA02g14450D	8157082	8158400	3'_69724
GV/GR	FaST-LMM	A02	8228124	A/T	BnaA02g14460D	8159312	8161218	5'_66906
GV/GR	FaST-LMM	A02	8228124	A/T	BnaA02g14470D	8163992	8165299	5'_62825
GV/GR	FaST-LMM	A02	8228124	A/T	BnaA02g14480D	8166642	8169605	5'_58519
GV/GR	FaST-LMM	A02	8228124	A/T	BnaA02g14490D	8200831	8202439	3'_25685
GV/GR	FaST-LMM	A02	8228124	A/T	BnaA02g14500D	8203672	8208369	3'_19755
GV/GR	FaST-LMM	A02	8228124	A/T	BnaA02g14510D	8210438	8211776	3'_16348
GV/GR	FaST-LMM	A02	8228124	A/T	BnaA02g14520D	8214175	8215185	3'_12939
GV/GR	FaST-LMM	A02	8228124	A/T	BnaA02g14530D	8216476	8217236	3'_10888
GV/GR	FaST-LMM	A02	8228124	A/T	BnaA02g14540D	8228996	8229625	3'_872
GV/GR	FaST-LMM	A02	8228124	A/T	BnaA02g14550D	8246347	8248059	5'_18223
GV/GR	FaST-LMM	A02	8228124	A/T	BnaA02g14560D	8257341	8258906	5'_29217
GV/GR	FaST-LMM	A02	8228124	A/T	BnaA02g14570D	8265142	8266107	5'_37018
GV/GR	FaST-LMM	A02	8228124	A/T	BnaA02g14580D	8273118	8274696	5'_44994
GV/GR	FaST-LMM	A02	8228124	A/T	BnaA02g14590D	8282303	8283631	5'_54179
GV/GR	FaST-LMM	A02	8228124	A/T	BnaA02g14600D	8293249	8295085	3'_65125
GV/GR	FaST-LMM	A02	8228124	A/T	BnaA02g14610D	8295477	8297159	3'_67353
GV/GR	FaST-LMM	A02	8228124	A/T	BnaA02g14620D	8297360	8302895	3'_69236
GV/GR	FaST-LMM	A02	8228124	A/T	BnaA02g14630D	8303395	8304983	3'_75271
GV/GR	FaST-LMM	A02	8228124	A/T	BnaA02g14640D	8305374	8307449	3'_77250
GV/GR	FaST-LMM	A02	8228124	A/T	BnaA02g14650D	8313910	8315802	5'_85786
GV/GR	FaST-LMM	A02	8228124	A/T	BnaA02g14660D	8318205	8320657	5'_90081
GV/GR	FaST-LMM	A02	8228124	A/T	BnaA02g14670D	8321975	8326392	5'_93851
GV/GR	FaST-LMM	A03	26173037	G/C	BnaA03g50560D	26245647	26246138	3'_72610
GV/GR	FaST-LMM	A03	26173037	G/C	BnaA03g50570D	26247700	26249113	5'_74663
GV/GR	FaST-LMM	A03	26173037	G/C	BnaA03g50580D	26252079	26253083	5'_79042
GV/GR	FaST-LMM	A03	26173037	G/C	BnaA03g50590D	26255537	26255590	5'_82500
GV/GR	FaST-LMM	A03	26173037	G/C	BnaA03g50600D	26256738	26257006	3'_83701
GV/GR	FaST-LMM	A03	26173037	G/C	BnaA03g50610D	26258416	26258990	5'_85379
GV/GR	FaST-LMM	A03	26173037	G/C	BnaA03g50620D	26263609	26265646	5'_90572
GV/GR	FaST-LMM	A03	26173037	G/C	BnaA03g50630D	26265801	26268478	3'_92764
GV/GR	FaST-LMM	A03	26173037	G/C	BnaA03g50240D	26085421	26087234	3'_85803
GV/GR	FaST-LMM	A03	26173037	G/C	BnaA03g50250D	26087831	26090699	5'_82338
GV/GR	FaST-LMM	A03	26173037	G/C	BnaA03g50260D	26092103	26092138	5'_80899
GV/GR	FaST-LMM	A03	26173037	G/C	BnaA03g50270D	26092205	26095012	5'_78025
GV/GR	FaST-LMM	A03	26173037	G/C	BnaA03g50280D	26099755	26104602	5'_68435
GV/GR	FaST-LMM	A03	26173037	G/C	BnaA03g50290D	26104780	26105612	5'_67425
GV/GR	FaST-LMM	A03	26173037	G/C	BnaA03g50300D	26108966	26110169	3'_62868
GV/GR	FaST-LMM	A03	26173037	G/C	BnaA03g50310D	26124118	26125757	5'_47280
GV/GR	FaST-LMM	A03	26173037	G/C	BnaA03g50320D	26126196	26127921	5'_45116
GV/GR	FaST-LMM	A03	26173037	G/C	BnaA03g50330D	26134556	26137658	5'_35379
GV/GR	FaST-LMM	A03	26173037	G/C	BnaA03g50340D	26148221	26149401	5'_23636
GV/GR	FaST-LMM	A03	26173037	G/C	BnaA03g50350D	26150073	26151231	5'_21806
GV/GR	FaST-LMM	A03	26173037	G/C	BnaA03g50360D	26152851	26157959	3'_15078
GV/GR	FaST-LMM	A03	26173037	G/C	BnaA03g50370D	26158364	26160245	3'_12792
GV/GR	FaST-LMM	A03	26173037	G/C	BnaA03g50380D	26162287	26164249	3'_8788
GV/GR	FaST-LMM	A03	26173037	G/C	BnaA03g50390D	26165324	26165698	5'_7339
GV/GR	FaST-LMM	A03	26173037	G/C	BnaA03g50400D	26165752	26166133	5'_6904
GV/GR	FaST-LMM	A03	26173037	G/C	BnaA03g50410D	26166210	26168130	5'_4907
GV/GR	FaST-LMM	A03	26173037	G/C	BnaA03g50420D	26172124	26172644	5'_393
GV/GR	FaST-LMM	A03	26173037	G/C	BnaA03g50430D	26174267	26175051	5'_1230
GV/GR	FaST-LMM	A03	26173037	G/C	BnaA03g50440D	26175172	26175246	5'_2135
GV/GR	FaST-LMM	A03	26173037	G/C	BnaA03g50450D	26176546	26177727	5'_3509
GV/GR	FaST-LMM	A03	26173037	G/C	BnaA03g50460D	26178524	26179113	5'_5487
GV/GR	FaST-LMM	A03	26173037	G/C	BnaA03g50470D	26180475	26180789	3'_7438
GV/GR	FaST-LMM	A03	26173037	G/C	BnaA03g50480D	26182042	26185251	3'_9005
GV/GR	FaST-LMM	A03	26173037	G/C	BnaA03g50490D	26187714	26189515	5'_14677
GV/GR	FaST-LMM	A03	26173037	G/C	BnaA03g50500D	26195588	26198176	3'_22551
GV/GR	FaST-LMM	A03	26173037	G/C	BnaA03g50510D	26202615	26205982	3'_29578
GV/GR	FaST-LMM	A03	26173037	G/C	BnaA03g50520D	26209491	26209955	3'_36454
GV/GR	FaST-LMM	A03	26173037	G/C	BnaA03g50530D	26212035	26214498	5'_38998
GV/GR	FaST-LMM	A03	26173037	G/C	BnaA03g50540D	26214555	26219552	3'_41518
GV/GR	FaST-LMM	A03	26173037	G/C	BnaA03g50550D	26233391	26233612	3'_60354
GV/GR	FaST-LMM	A05	3162995	A/G	BnaA05g05860D	3066076	3067627	3'_95368
GV/GR	FaST-LMM	A05	3162995	A/G	BnaA05g05870D	3075263	3075943	5'_87052
GV/GR	FaST-LMM	A05	3162995	A/G	BnaA05g05880D	3087489	3089961	5'_73034
GV/GR	FaST-LMM	A05	3162995	A/G	BnaA05g05890D	3094878	3095581	3'_67414
GV/GR	FaST-LMM	A05	3162995	A/G	BnaA05g05900D	3096378	3097208	5'_65787
GV/GR	FaST-LMM	A05	3162995	A/G	BnaA05g05910D	3103761	3105110	3'_57885
GV/GR	FaST-LMM	A05	3162995	A/G	BnaA05g05920D	3106101	3109092	5'_53903
GV/GR	FaST-LMM	A05	3162995	A/G	BnaA05g05930D	3109882	3111970	5'_51025
GV/GR	FaST-LMM	A05	3162995	A/G	BnaA05g05940D	3158312	3160225	3'_2770
GV/GR	FaST-LMM	A05	3162995	A/G	BnaA05g05950D	3165411	3167342	5'_2416
GV/GR	FaST-LMM	A05	3162995	A/G	BnaA05g05960D	3175361	3177385	5'_12366
GV/GR	FaST-LMM	A05	3162995	A/G	BnaA05g05970D	3179199	3180134	5'_16204
GV/GR	FaST-LMM	A05	3162995	A/G	BnaA05g05980D	3195363	3195690	5'_32368
GV/GR	FaST-LMM	A05	3162995	A/G	BnaA05g05990D	3195753	3197686	5'_32758
GV/GR	FaST-LMM	A05	3162995	A/G	BnaA05g06000D	3197738	3203307	3'_34743
GV/GR	FaST-LMM	A05	3162995	A/G	BnaA05g06010D	3204444	3206946	5'_41449
GV/GR	FaST-LMM	A05	3162995	A/G	BnaA05g06020D	3207985	3210884	5'_44990
GV/GR	FaST-LMM	A05	3162995	A/G	BnaA05g06030D	3213110	3220226	5'_50115
GV/GR	FaST-LMM	A05	3162995	A/G	BnaA05g06040D	3220697	3223805	5'_57702
GV/GR	FaST-LMM	A05	3162995	A/G	BnaA05g06050D	3224237	3224861	3'_61242
GV/GR	FaST-LMM	A05	3162995	A/G	BnaA05g06060D	3225054	3228208	5'_62059
GV/GR	FaST-LMM	A05	3162995	A/G	BnaA05g06070D	3228502	3229663	3'_65507
GV/GR	FaST-LMM	A05	3162995	A/G	BnaA05g06080D	3233729	3235603	5'_70734
GV/GR	FaST-LMM	A05	3162995	A/G	BnaA05g06090D	3237008	3239407	5'_74013
GV/GR	FaST-LMM	A05	3162995	A/G	BnaA05g06100D	3257215	3260454	3'_94220
GV/GR	FaST-LMM	A05	5280751	C/G	BnaA05g09760D	5362744	5366275	5'_81993
GV/GR	FaST-LMM	A05	5280751	C/G	BnaA05g09750D	5357228	5360740	5'_76477
GV/GR	FaST-LMM	A05	5280751	C/G	BnaA05g09740D	5354376	5356420	5'_73625
GV/GR	FaST-LMM	A05	5280751	C/G	BnaA05g09730D	5349175	5351442	3'_68424
GV/GR	FaST-LMM	A05	5280751	C/G	BnaA05g09720D	5346402	5348037	5'_65651
GV/GR	FaST-LMM	A05	5280751	C/G	BnaA05g09710D	5344374	5345977	5'_63623
GV/GR	FaST-LMM	A05	5280751	C/G	BnaA05g09700D	5339138	5341143	3'_58387
GV/GR	FaST-LMM	A05	5280751	C/G	BnaA05g09690D	5335883	5338687	5'_55132
GV/GR	FaST-LMM	A05	5280751	C/G	BnaA05g09680D	5331116	5333510	5'_50365
GV/GR	FaST-LMM	A05	5280751	C/G	BnaA05g09670D	5324061	5325289	5'_43310
GV/GR	FaST-LMM	A05	5280751	C/G	BnaA05g09660D	5318323	5320835	5'_37572
GV/GR	FaST-LMM	A05	5280751	C/G	BnaA05g09650D	5312594	5314705	5'_31843
GV/GR	FaST-LMM	A05	5280751	C/G	BnaA05g09640D	5307867	5309481	3'_27116
GV/GR	FaST-LMM	A05	5280751	C/G	BnaA05g09630D	5302838	5307792	5'_22087
GV/GR	FaST-LMM	A05	5280751	C/G	BnaA05g09620D	5293593	5294734	3'_12842
GV/GR	FaST-LMM	A05	5280751	C/G	BnaA05g09610D	5290812	5292678	3'_10061
GV/GR	FaST-LMM	A05	5280751	C/G	BnaA05g09600D	5288777	5290243	5'_8026
GV/GR	FaST-LMM	A05	5280751	C/G	BnaA05g09590D	5282023	5283406	3'_1272
GV/GR	FaST-LMM	A05	5280751	C/G	BnaA05g09580D	5275505	5275741	5'_5010
GV/GR	FaST-LMM	A05	5280751	C/G	BnaA05g09570D	5271037	5273645	5'_7106
GV/GR	FaST-LMM	A05	5280751	C/G	BnaA05g09560D	5269365	5270540	3'_10211
GV/GR	FaST-LMM	A05	5280751	C/G	BnaA05g09550D	5266354	5268854	5'_11897
GV/GR	FaST-LMM	A05	5280751	C/G	BnaA05g09540D	5262813	5266242	3'_14509
GV/GR	FaST-LMM	A05	5280751	C/G	BnaA05g09530D	5260547	5261958	3'_18793
GV/GR	FaST-LMM	A05	5280751	C/G	BnaA05g09520D	5257883	5258473	3'_22278
GV/GR	FaST-LMM	A05	5280751	C/G	BnaA05g09510D	5235316	5241250	5'_39501
GV/GR	FaST-LMM	A05	5280751	C/G	BnaA05g09500D	5227898	5232035	5'_48716
GV/GR	FaST-LMM	A05	5280751	C/G	BnaA05g09490D	5227541	5227744	5'_53007
GV/GR	FaST-LMM	A05	5280751	C/G	BnaA05g09480D	5226382	5227223	3'_53528
GV/GR	FaST-LMM	A05	5280751	C/G	BnaA05g09470D	5224603	5225713	3'_55038
GV/GR	FaST-LMM	A05	5280751	C/G	BnaA05g09460D	5221130	5223668	3'_57083
GV/GR	FaST-LMM	A05	5280751	C/G	BnaA05g09450D	5219029	5220548	3'_60203
GV/GR	FaST-LMM	A05	5280751	C/G	BnaA05g09440D	5210471	5212273	5'_68478
GV/GR	FaST-LMM	A05	5280751	C/G	BnaA05g09430D	5207973	5209949	5'_70802
GV/GR	FaST-LMM	A05	5280751	C/G	BnaA05g09420D	5206788	5207906	5'_72845
GV/GR	FaST-LMM	A05	5280751	C/G	BnaA05g09410D	5205392	5206471	3'_74280
GV/GR	FaST-LMM	A05	5280751	C/G	BnaA05g09400D	5203770	5204885	5'_75866
GV/GR	FaST-LMM	A05	5280751	C/G	BnaA05g09390D	5198669	5200303	5'_80448
GV/GR	FaST-LMM	A05	5280751	C/G	BnaA05g09380D	5197545	5198580	5'_82171
GV/GR	FaST-LMM	A05	5280751	C/G	BnaA05g09370D	5195743	5196189	5'_84562
GV/GR	FaST-LMM	A05	5280751	C/G	BnaA05g09360D	5195103	5195312	5'_85439
GV/GR	FaST-LMM	A05	5280751	C/G	BnaA05g09350D	5193694	5194771	3'_85980
GV/GR	FaST-LMM	A05	5280751	C/G	BnaA05g09340D	5190073	5191566	3'_89185
GV/GR	FaST-LMM	A05	5280751	C/G	BnaA05g09330D	5180912	5184160	3'_96591
GV/GR	FaST-LMM	C09	12521335	C/A	BnaC09g15610D	12444741	12457690	3'_63645
GV/GR	FaST-LMM	C09	12521335	C/A	BnaC09g15620D	12459455	12461152	3'_60183
GV/GR	FaST-LMM	C09	12521335	C/A	BnaC09g15630D	12466967	12467290	5'_54045
GV/GR	FaST-LMM	C09	12521335	C/A	BnaC09g15640D	12489515	12492770	3'_28565
GV/GR	FaST-LMM	C09	12521335	C/A	BnaC09g15650D	12519670	12521582	--
GV/GR	FaST-LMM	C09	12521335	C/A	BnaC09g15660D	12539702	12542245	5'_18367
GV/GR	FaST-LMM	C09	12521335	C/A	BnaC09g15670D	12609681	12611365	5'_88346
GV/GR	FaST-LMM	C09	12521335	C/A	BnaC09g15680D	12612565	12616563	5'_91230
GR/RSDI	FaST-LMM	A05	3343343, 3343351	C/T	BnaA05g06110D	3264276	3268577	3'_74766
GR/RSDI	FaST-LMM	A05	3343343, 3343351	C/T	BnaA05g06120D	3269299	3271590	5'_71753
GR/RSDI	FaST-LMM	A05	3343343, 3343351	C/T	BnaA05g06130D	3272922	3277011	3'_66332
GR/RSDI	FaST-LMM	A05	3343343, 3343351	C/T	BnaA05g06140D	3277149	3279644	3'_63699
GR/RSDI	FaST-LMM	A05	3343343, 3343351	C/T	BnaA05g06150D	3282207	3282740	5'_60603
GR/RSDI	FaST-LMM	A05	3343343, 3343351	C/T	BnaA05g06160D	3282814	3284214	5'_59129
GR/RSDI	FaST-LMM	A05	3343343, 3343351	C/T	BnaA05g06170D	3290624	3293649	5'_49694
GR/RSDI	FaST-LMM	A05	3343343, 3343351	C/T	BnaA05g06180D	3298613	3301525	5'_41818
GR/RSDI	FaST-LMM	A05	3343343, 3343351	C/T	BnaA05g06190D	3302275	3306910	5'_36433
GR/RSDI	FaST-LMM	A05	3343343, 3343351	C/T	BnaA05g06200D	3307014	3308615	5'_34728
GR/RSDI	FaST-LMM	A05	3343343, 3343351	C/T	BnaA05g06210D	3310985	3312682	5'_30661
GR/RSDI	FaST-LMM	A05	3343343, 3343351	C/T	BnaA05g06220D	3315201	3315750	5'_27593
GR/RSDI	FaST-LMM	A05	3343343, 3343351	C/T	BnaA05g06230D	3318785	3321342	5'_22001
GR/RSDI	FaST-LMM	A05	3343343, 3343351	C/T	BnaA05g06240D	3323709	3326155	3'_17188
GR/RSDI	FaST-LMM	A05	3343343, 3343351	C/T	BnaA05g06250D	3331178	3332549	3'_10794
GR/RSDI	FaST-LMM	A05	3343343, 3343351	C/T	BnaA05g06260D	3332868	3334807	5'_8536
GR/RSDI	FaST-LMM	A05	3343343, 3343351	C/T	BnaA05g06270D	3335099	3335902	3'_7441
GR/RSDI	FaST-LMM	A05	3343343, 3343351	C/T	BnaA05g06280D	3341033	3347995	--
GR/RSDI	FaST-LMM	A05	3343343, 3343351	C/T	BnaA05g06290D	3348638	3350401	3'_5295
GR/RSDI	FaST-LMM	A05	3343343, 3343351	C/T	BnaA05g06300D	3351776	3352153	3'_8433
GR/RSDI	FaST-LMM	A05	3343343, 3343351	C/T	BnaA05g06310D	3354546	3355160	5'_11203
GR/RSDI	FaST-LMM	A05	3343343, 3343351	C/T	BnaA05g06320D	3355732	3362213	3'_12389
GR/RSDI	FaST-LMM	A05	3343343, 3343351	C/T	BnaA05g06330D	3363395	3363859	5'_20052
GR/RSDI	FaST-LMM	A05	3343343, 3343351	C/T	BnaA05g06340D	3364377	3365498	3'_21034
GR/RSDI	FaST-LMM	A05	3343343, 3343351	C/T	BnaA05g06350D	3368011	3368283	5'_24668
GR/RSDI	FaST-LMM	A05	3343343, 3343351	C/T	BnaA05g06360D	3368349	3374830	5'_25006
GR/RSDI	FaST-LMM	A05	3343343, 3343351	C/T	BnaA05g06370D	3375046	3377804	3'_31703
GR/RSDI	FaST-LMM	A05	3343343, 3343351	C/T	BnaA05g06380D	3378227	3380226	5'_34884
GR/RSDI	FaST-LMM	A05	3343343, 3343351	C/T	BnaA05g06390D	3383150	3383726	5'_39807
GR/RSDI	FaST-LMM	A05	3343343, 3343351	C/T	BnaA05g06400D	3383915	3387362	3'_40572
GR/RSDI	FaST-LMM	A05	3343343, 3343351	C/T	BnaA05g06410D	3388535	3391811	5'_45192
GR/RSDI	GLM	C08	38115759	G/T	BnaC08g45490D	38133932	38137594	5'_18173
GR/RSDI	GLM	C08	38115759	G/T	BnaC08g45500D	38138369	38140160	5'_22610
GR/RSDI	GLM	C08	38115759	G/T	BnaC08g45510D	38141760	38149974	3'_26001
GR/RSDI	GLM	C08	38115759	G/T	BnaC08g45520D	38152773	38153494	5'_37014
GR/RSDI	GLM	C08	38115759	G/T	BnaC08g45530D	38153726	38156060	3'_37967
GR/RSDI	GLM	C08	38115759	G/T	BnaC08g45540D	38156195	38157431	5'_40436
GR/RSDI	GLM	C08	38115759	G/T	BnaC08g45550D	38157488	38158241	5'_41729
GR/RSDI	GLM	C08	38115759	G/T	BnaC08g45560D	38159352	38159684	5'_43593
GR/RSDI	GLM	C08	38115759	G/T	BnaC08g45570D	38160005	38160860	5'_44246
GR/RSDI	GLM	C08	38115759	G/T	BnaC08g45580D	38165335	38167345	5'_49576
GR/RSDI	GLM	C08	38115759	G/T	BnaC08g45590D	38168019	38170116	5'_52260
GR/RSDI	GLM	C08	38115759	G/T	BnaC08g45600D	38171433	38172848	5'_55674
GR/RSDI	GLM	C08	38115759	G/T	BnaC08g45610D	38172908	38177307	5'_57149
GR/RSDI	GLM	C08	38115759	G/T	BnaC08g45620D	38178121	38180930	3'_62362
GR/RSDI	GLM	C08	38115759	G/T	BnaC08g45630D	38186800	38187511	5'_71041
GR/RSDI	GLM	C08	38115759	G/T	BnaC08g45640D	38187705	38188106	5'_71946
GR/RSDI	GLM	C08	38115759	G/T	BnaC08g45650D	38189545	38190009	5'_73786
GR/RSDI	GLM	C08	38115759	G/T	BnaC08g45660D	38190112	38190651	5'_74353
GR/RSDI	GLM	C08	38115759	G/T	BnaC08g45670D	38191416	38192327	5'_75657
GR/RSDI	GLM	C08	38115759	G/T	BnaC08g45680D	38196365	38200063	5'_80606
GR/RSDI	GLM	C08	38115759	G/T	BnaC08g45690D	38201816	38202776	5'_86057
GR/RSDI	GLM	C08	38115759	G/T	BnaC08g45700D	38202833	38203054	5'_87074
GR/RSDI	GLM	C08	38115759	G/T	BnaC08g45710D	38203387	38206567	3'_87628
GR/RSDI	GLM	C08	38115759	G/T	BnaC08g45720D	38206662	38209216	3'_90903
GR/RSDI	GLM	C08	38115759	G/T	BnaC08g45730D	38209918	38214141	5'_94159
GR/RSDI	GLM	C08	38115759	G/T	BnaC08g45480D	38115528	38117685	--
GR/RSDI	GLM	C08	38115759	G/T	BnaC08g45470D	38111073	38113314	5'_2445
GR/RSDI	GLM	C08	38115759	G/T	BnaC08g45460D	38106850	38110991	3'_4768
GR/RSDI	GLM	C08	38115759	G/T	BnaC08g45450D	38103412	38105315	3'_10444
GR/RSDI	GLM	C08	38115759	G/T	BnaC08g45440D	38099224	38103353	3'_12406
GR/RSDI	GLM	C08	38115759	G/T	BnaC08g45430D	38096625	38097853	3'_17906
GR/RSDI	GLM	C08	38115759	G/T	BnaC08g45420D	38093845	38095907	3'_19852
GR/RSDI	GLM	C08	38115759	G/T	BnaC08g45410D	38091405	38093266	3'_22493
GR/RSDI	GLM	C08	38115759	G/T	BnaC08g45400D	38084775	38087806	5'_27953
GR/RSDI	GLM	C08	38115759	G/T	BnaC08g45390D	38080812	38082914	5'_32845
GR/RSDI	GLM	C08	38115759	G/T	BnaC08g45380D	38076374	38080343	3'_35416
GR/RSDI	GLM	C08	38115759	G/T	BnaC08g45370D	38071666	38072060	5'_43699
GR/RSDI	GLM	C08	38115759	G/T	BnaC08g45360D	38066739	38069314	5'_46445
GR/RSDI	GLM	C08	38115759	G/T	BnaC08g45350D	38066050	38066687	3'_49072
GR/RSDI	GLM	C08	38115759	G/T	BnaC08g45340D	38063529	38064749	5'_51010
GR/RSDI	GLM	C08	38115759	G/T	BnaC08g45330D	38041758	38044193	3'_71566
GR/RSDI	GLM	C08	38115759	G/T	BnaC08g45320D	38040135	38040986	3'_74773
GR/RSDI	GLM	C08	38115759	G/T	BnaC08g45310D	38037731	38039908	3'_75851
GR/RSDI	GLM	C08	38115759	G/T	BnaC08g45300D	38030183	38030728	3'_85031
GR/RSDI	GLM	C08	38115759	G/T	BnaC08g45290D	38025042	38029489	3'_86270
GR/RSDI	GLM	C08	38115759	G/T	BnaC08g45280D	38023435	38024743	3'_91016
GR/RSDI	GLM	C08	38115759	G/T	BnaC08g45270D	38021851	38022891	5'_92868
GR/RSDI	GLM	C08	38115759	G/T	BnaC08g45260D	38019899	38020652	5'_95107
GR/RSDI	GLM	C08	38115759	G/T	BnaC08g45250D	38016929	38018759	5'_97000
GR/RSDI	GLM	C08	38115759	G/T	BnaC08g45240D	38013604	38016839	3'_98920
GV/GR/RSDI	FaST-LMM	A02	2496879	T/C	BnaA02g05270D	2397598	2398479	3'_98400
GV/GR/RSDI	FaST-LMM	A02	2496879	T/C	BnaA02g05280D	2399956	2401870	5'_95009
GV/GR/RSDI	FaST-LMM	A02	2496879	T/C	BnaA02g05290D	2403187	2408757	3'_88122
GV/GR/RSDI	FaST-LMM	A02	2496879	T/C	BnaA02g05300D	2409427	2413814	5'_83065
GV/GR/RSDI	FaST-LMM	A02	2496879	T/C	BnaA02g05310D	2417157	2419486	3'_77393
GV/GR/RSDI	FaST-LMM	A02	2496879	T/C	BnaA02g05320D	2419549	2420771	5'_76108
GV/GR/RSDI	FaST-LMM	A02	2496879	T/C	BnaA02g05330D	2421506	2425216	3'_71663
GV/GR/RSDI	FaST-LMM	A02	2496879	T/C	BnaA02g05340D	2433263	2436786	3'_60093
GV/GR/RSDI	FaST-LMM	A02	2496879	T/C	BnaA02g05350D	2440836	2441051	5'_55828
GV/GR/RSDI	FaST-LMM	A02	2496879	T/C	BnaA02g05360D	2443830	2444921	5'_51958
GV/GR/RSDI	FaST-LMM	A02	2496879	T/C	BnaA02g05370D	2446801	2448081	5'_48798
GV/GR/RSDI	FaST-LMM	A02	2496879	T/C	BnaA02g05380D	2448775	2451979	5'_44900
GV/GR/RSDI	FaST-LMM	A02	2496879	T/C	BnaA02g05390D	2462570	2464174	5'_32705
GV/GR/RSDI	FaST-LMM	A02	2496879	T/C	BnaA02g05400D	2479051	2480107	3'_16772
GV/GR/RSDI	FaST-LMM	A02	2496879	T/C	BnaA02g05410D	2480807	2483472	3'_13407
GV/GR/RSDI	FaST-LMM	A02	2496879	T/C	BnaA02g05420D	2483606	2490550	5'_6329
GV/GR/RSDI	FaST-LMM	A02	2496879	T/C	BnaA02g05430D	2491959	2494148	5'_2731
GV/GR/RSDI	FaST-LMM	A02	2496879	T/C	BnaA02g05440D	2495183	2497851	--
GV/GR/RSDI	FaST-LMM	A02	2496879	T/C	BnaA02g05450D	2501660	2503264	3'_4781
GV/GR/RSDI	FaST-LMM	A02	2496879	T/C	BnaA02g05460D	2518109	2521700	3'_21230
GV/GR/RSDI	FaST-LMM	A02	2496879	T/C	BnaA02g05470D	2533398	2534197	3'_36519
GV/GR/RSDI	FaST-LMM	A02	2496879	T/C	BnaA02g05480D	2535307	2537118	3'_38428
GV/GR/RSDI	FaST-LMM	A02	2496879	T/C	BnaA02g05490D	2540873	2541691	5'_43994
GV/GR/RSDI	FaST-LMM	A02	2496879	T/C	BnaA02g05500D	2542473	2542961	5'_45594
GV/GR/RSDI	FaST-LMM	A02	2496879	T/C	BnaA02g05510D	2543594	2544830	3'_46715
GV/GR/RSDI	FaST-LMM	A02	2496879	T/C	BnaA02g05520D	2548591	2548857	3'_51712
GV/GR/RSDI	FaST-LMM	A02	2496879	T/C	BnaA02g05530D	2549973	2550952	3'_53094
GV/GR/RSDI	FaST-LMM	A02	2496879	T/C	BnaA02g05540D	2554638	2556318	3'_57759
GV/GR/RSDI	FaST-LMM	A02	2496879	T/C	BnaA02g05550D	2556760	2557548	3'_59881
GV/GR/RSDI	FaST-LMM	A02	2496879	T/C	BnaA02g05560D	2560525	2562521	5'_63646
GV/GR/RSDI	FaST-LMM	A02	2496879	T/C	BnaA02g05570D	2562759	2565765	3'_65880
GV/GR/RSDI	FaST-LMM	A02	2496879	T/C	BnaA02g05580D	2566487	2569520	3'_69608
GV/GR/RSDI	FaST-LMM	A02	2496879	T/C	BnaA02g05590D	2569927	2571416	3'_73048
GV/GR/RSDI	FaST-LMM	A02	2496879	T/C	BnaA02g05600D	2574575	2576006	3'_77696
GV/GR/RSDI	FaST-LMM	A02	2496879	T/C	BnaA02g05610D	2581864	2582481	3'_84985
GV/GR/RSDI	FaST-LMM	A02	2496879	T/C	BnaA02g05620D	2588447	2590429	3'_91568
GV/GR/RSDI	FaST-LMM	A02	2496879	T/C	BnaA02g05630D	2591854	2592197	3'_94975
GV/GR/RSDI	FaST-LMM	A02	2496879	T/C	BnaA02g05640D	2594507	2595296	5'_97628
GV/GR/RSDI	GLM	C09	34383182	G/T	BnaC09g31260D	34285762	34287977	5'_95205
GV/GR/RSDI	GLM	C09	34383182	G/T	BnaC09g31270D	34288229	34291166	5'_92016
GV/GR/RSDI	GLM	C09	34383182	G/T	BnaC09g31280D	34295999	34296358	5'_86824
GV/GR/RSDI	GLM	C09	34383182	G/T	BnaC09g31290D	34314049	34317255	3'_65927
GV/GR/RSDI	GLM	C09	34383182	G/T	BnaC09g31300D	34317382	34317524	3'_65658
GV/GR/RSDI	GLM	C09	34383182	G/T	BnaC09g31310D	34331444	34331680	5'_51502
GV/GR/RSDI	GLM	C09	34383182	G/T	BnaC09g31320D	34338797	34338946	5'_44236
GV/GR/RSDI	GLM	C09	34383182	G/T	BnaC09g31330D	34342520	34344413	5'_38769
GV/GR/RSDI	GLM	C09	34383182	G/T	BnaC09g31340D	34350303	34352295	5'_30887
GV/GR/RSDI	GLM	C09	34383182	G/T	BnaC09g31350D	34356344	34359112	5'_24070
GV/GR/RSDI	GLM	C09	34383182	G/T	BnaC09g31360D	34368246	34369814	5'_13368
GV/GR/RSDI	GLM	C09	34383182	G/T	BnaC09g31370D	34370131	34371649	3'_11533
GV/GR/RSDI	GLM	C09	34383182	G/T	BnaC09g31380D	34375213	34377627	3'_5555
GV/GR/RSDI	GLM	C09	34383182	G/T	BnaC09g31390D	34390032	34392654	5'_6850
GV/GR/RSDI	GLM	C09	34383182	G/T	BnaC09g31400D	34392926	34395630	5'_9744
GV/GR/RSDI	GLM	C09	34383182	G/T	BnaC09g31410D	34399248	34399568	3'_16066
GV/GR/RSDI	GLM	C09	34383182	G/T	BnaC09g31420D	34402056	34403765	3'_18874
GV/GR/RSDI	GLM	C09	34383182	G/T	BnaC09g31430D	34406596	34407504	3'_23414
GV/GR/RSDI	GLM	C09	34383182	G/T	BnaC09g31440D	34408325	34408576	3'_25143
GV/GR/RSDI	GLM	C09	34383182	G/T	BnaC09g31450D	34418146	34418484	3'_34964
GV/GR/RSDI	GLM	C09	34383182	G/T	BnaC09g31460D	34419229	34421052	3'_36047
GV/GR/RSDI	GLM	C09	34383182	G/T	BnaC09g31470D	34425919	34428191	5'_42737
GV/GR/RSDI	GLM	C09	34383182	G/T	BnaC09g31480D	34429599	34429999	5'_46417
GV/GR/RSDI	GLM	C09	34383182	G/T	BnaC09g31490D	34430612	34431001	5'_47430
GV/GR/RSDI	GLM	C09	34383182	G/T	BnaC09g31500D	34432224	34432952	5'_49042
GV/GR/RSDI	GLM	C09	34383182	G/T	BnaC09g31510D	34456917	34457156	3'_73735
GV/GR/RSDI	GLM	C09	34383182	G/T	BnaC09g31520D	34458770	34462336	5'_75588
GV/GR/RSDI	GLM	C09	34383182	G/T	BnaC09g31530D	34468495	34468922	5'_85313
GV/GR/RSDI	GLM	C09	34383182	G/T	BnaC09g31540D	34472679	34473892	5'_89497
GV/GR/RSDI	GLM	C09	34383182	G/T	BnaC09g31550D	34480749	34481886	5'_97567
GV/GR/RSDI	GLM	C09	34383182	G/T	BnaC09g31560D	34482619	34484576	3'_99437
GV/GR/RSDI	FaST-LMM	A05	1728617	G/A	BnaA05g03260D	1827049	1829037	5'_98432
GV/GR/RSDI	FaST-LMM	A05	1728617	G/A	BnaA05g03250D	1815458	1816807	5'_86841
GV/GR/RSDI	FaST-LMM	A05	1728617	G/A	BnaA05g03240D	1810424	1814583	5'_81807
GV/GR/RSDI	FaST-LMM	A05	1728617	G/A	BnaA05g03230D	1807252	1809287	5'_78635
GV/GR/RSDI	FaST-LMM	A05	1728617	G/A	BnaA05g03220D	1804433	1806401	5'_75816
GV/GR/RSDI	FaST-LMM	A05	1728617	G/A	BnaA05g03210D	1801172	1804248	5'_72555
GV/GR/RSDI	FaST-LMM	A05	1728617	G/A	BnaA05g03200D	1728640	1730208	3'_23
GV/GR/RSDI	FaST-LMM	A05	1728617	G/A	BnaA05g03190D	1723935	1726392	5'_2225
GV/GR/RSDI	FaST-LMM	A05	1728617	G/A	BnaA05g03180D	1722602	1723384	5'_5233
GV/GR/RSDI	FaST-LMM	A05	1728617	G/A	BnaA05g03170D	1720715	1722364	3'_6253
GV/GR/RSDI	FaST-LMM	A05	1728617	G/A	BnaA05g03160D	1718417	1720311	3'_8306
GV/GR/RSDI	FaST-LMM	A05	1728617	G/A	BnaA05g03150D	1711282	1716419	3'_12198
GV/GR/RSDI	FaST-LMM	A05	1728617	G/A	BnaA05g03140D	1705975	1710201	5'_18416
GV/GR/RSDI	FaST-LMM	A05	1728617	G/A	BnaA05g03130D	1702384	1704432	3'_24185
GV/GR/RSDI	FaST-LMM	A05	1728617	G/A	BnaA05g03120D	1700721	1701838	5'_26779
GV/GR/RSDI	FaST-LMM	A05	1728617	G/A	BnaA05g03110D	1693339	1698116	5'_30501
GV/GR/RSDI	FaST-LMM	A05	1728617	G/A	BnaA05g03100D	1690123	1692726	5'_35891
GV/GR/RSDI	FaST-LMM	A05	1728617	G/A	BnaA05g03090D	1678812	1680200	5'_48417
GV/GR/RSDI	FaST-LMM	A05	1728617	G/A	BnaA05g03080D	1677499	1678748	3'_49869
GV/GR/RSDI	FaST-LMM	A05	1728617	G/A	BnaA05g03070D	1673466	1675379	3'_53238
GV/GR/RSDI	FaST-LMM	A05	1728617	G/A	BnaA05g03060D	1652644	1655492	3'_73125
GV/GR/RSDI	FaST-LMM	A05	1728617	G/A	BnaA05g03050D	1644457	1647484	3'_81133
GV/GR/RSDI	FaST-LMM	A05	1728617	G/A	BnaA05g03040D	1640911	1643064	3'_85553
GV/GR/RSDI	FaST-LMM	A05	1728617	G/A	BnaA05g03030D	1636754	1638118	3'_90499
GV/GR/RSDI	FaST-LMM	A05	1728617	G/A	BnaA05g03020D	1629833	1633657	3'_94960
GV/GR/RSDI	FaST-LMM	A05	1728617	G/A	BnaA05g03010D	1627737	1628786	3'_99831
GV/GR/RSDI	FaST-LMM	A05	6670181, 6692257, 6692275	C/T	BnaA05g11920D	6768412	6770358	3'_98231
GV/GR/RSDI	FaST-LMM	A05	6670181, 6692257, 6692275	C/T	BnaA05g11910D	6765657	6766343	5'_95476
GV/GR/RSDI	FaST-LMM	A05	6670181, 6692257, 6692275	C/T	BnaA05g11900D	6762840	6762950	3'_92659
GV/GR/RSDI	FaST-LMM	A05	6670181, 6692257, 6692275	C/T	BnaA05g11890D	6759087	6760167	5'_88906
GV/GR/RSDI	FaST-LMM	A05	6670181, 6692257, 6692275	C/T	BnaA05g11880D	6747961	6752424	3'_77780
GV/GR/RSDI	FaST-LMM	A05	6670181, 6692257, 6692275	C/T	BnaA05g11870D	6741457	6743150	3'_71276
GV/GR/RSDI	FaST-LMM	A05	6670181, 6692257, 6692275	C/T	BnaA05g11860D	6734556	6735696	3'_64375
GV/GR/RSDI	FaST-LMM	A05	6670181, 6692257, 6692275	C/T	BnaA05g11850D	6731534	6733889	5'_61353
GV/GR/RSDI	FaST-LMM	A05	6670181, 6692257, 6692275	C/T	BnaA05g11840D	6707245	6708740	3'_37064
GV/GR/RSDI	FaST-LMM	A05	6670181, 6692257, 6692275	C/T	BnaA05g11830D	6700611	6704341	3'_30430
GV/GR/RSDI	FaST-LMM	A05	6670181, 6692257, 6692275	C/T	BnaA05g11820D	6695369	6698173	3'_25188
GV/GR/RSDI	FaST-LMM	A05	6670181, 6692257, 6692275	C/T	BnaA05g11810D	6693157	6694677	5'_22976
GV/GR/RSDI	FaST-LMM	A05	6670181, 6692257, 6692275	C/T	BnaA05g11800D	6687525	6692923	5'_17344
GV/GR/RSDI	FaST-LMM	A05	6670181, 6692257, 6692275	C/T	BnaA05g11790D	6684029	6685656	5'_13848
GV/GR/RSDI	FaST-LMM	A05	6670181, 6692257, 6692275	C/T	BnaA05g11780D	6656681	6659914	5'_10267
GV/GR/RSDI	FaST-LMM	A05	6670181, 6692257, 6692275	C/T	BnaA05g11770D	6654714	6656398	3'_13783
GV/GR/RSDI	FaST-LMM	A05	6670181, 6692257, 6692275	C/T	BnaA05g11760D	6649706	6650317	5'_19864
GV/GR/RSDI	FaST-LMM	A05	6670181, 6692257, 6692275	C/T	BnaA05g11750D	6644918	6646115	3'_24066
GV/GR/RSDI	FaST-LMM	A05	6670181, 6692257, 6692275	C/T	BnaA05g11740D	6641250	6643024	5'_27157
GV/GR/RSDI	FaST-LMM	A05	6670181, 6692257, 6692275	C/T	BnaA05g11730D	6632423	6635099	5'_35082
GV/GR/RSDI	FaST-LMM	A05	6670181, 6692257, 6692275	C/T	BnaA05g11720D	6631123	6632217	3'_37964
GV/GR/RSDI	FaST-LMM	A05	6670181, 6692257, 6692275	C/T	BnaA05g11710D	6627541	6629687	5'_40494
GV/GR/RSDI	FaST-LMM	A05	6670181, 6692257, 6692275	C/T	BnaA05g11700D	6621893	6626107	3'_44074
GV/GR/RSDI	FaST-LMM	A05	6670181, 6692257, 6692275	C/T	BnaA05g11690D	6619993	6621624	3'_48557
GV/GR/RSDI	FaST-LMM	A05	6670181, 6692257, 6692275	C/T	BnaA05g11680D	6598380	6598982	5'_71199
GV/GR/RSDI	FaST-LMM	A05	6670181, 6692257, 6692275	C/T	BnaA05g11670D	6593689	6594578	5'_75603
GV/GR/RSDI	FaST-LMM	A05	6670181	C/T	BnaA05g11660D	6591403	6592041	5'_78140
GV/GR/RSDI	FaST-LMM	A05	6670181	C/T	BnaA05g11650D	6586229	6588252	3'_81929
GV/GR/RSDI	FaST-LMM	A05	6670181	C/T	BnaA05g11640D	6582276	6584304	3'_85877
GV/GR/RSDI	FaST-LMM	A05	16051518	C/A	BnaA05g20580D	15949088	15952214	3'_99304
GV/GR/RSDI	FaST-LMM	A05	16051518	C/A	BnaA05g20590D	15952367	15954179	5'_97339
GV/GR/RSDI	FaST-LMM	A05	16051518	C/A	BnaA05g20600D	15954790	15956941	5'_94577
GV/GR/RSDI	FaST-LMM	A05	16051518	C/A	BnaA05g20610D	15958917	15961351	5'_90167
GV/GR/RSDI	FaST-LMM	A05	16051518	C/A	BnaA05g20620D	15962704	15965625	3'_85893
GV/GR/RSDI	FaST-LMM	A05	16051518	C/A	BnaA05g20630D	15979916	15983159	5'_68359
GV/GR/RSDI	FaST-LMM	A05	16051518	C/A	BnaA05g20640D	15986304	15989708	5'_61810
GV/GR/RSDI	FaST-LMM	A05	16051518	C/A	BnaA05g20650D	15994505	15996060	5'_55458
GV/GR/RSDI	FaST-LMM	A05	16051518	C/A	BnaA05g20660D	15997709	15999783	5'_51735
GV/GR/RSDI	FaST-LMM	A05	16051518	C/A	BnaA05g20780D	16128109	16134340	5'_76591
GV/GR/RSDI	FaST-LMM	A05	16051518	C/A	BnaA05g20770D	16117354	16118964	5'_65836
GV/GR/RSDI	FaST-LMM	A05	16051518	C/A	BnaA05g20760D	16116592	16117196	5'_65074
GV/GR/RSDI	FaST-LMM	A05	16051518	C/A	BnaA05g20750D	16107308	16109466	3'_55790
GV/GR/RSDI	FaST-LMM	A05	16051518	C/A	BnaA05g20740D	16105667	16106906	5'_54149
GV/GR/RSDI	FaST-LMM	A05	16051518	C/A	BnaA05g20730D	16074509	16075470	3'_22991
GV/GR/RSDI	FaST-LMM	A05	16051518	C/A	BnaA05g20720D	16066390	16068107	3'_14872
GV/GR/RSDI	FaST-LMM	A05	16051518	C/A	BnaA05g20710D	16063947	16066166	5'_12429
GV/GR/RSDI	FaST-LMM	A05	16051518	C/A	BnaA05g20700D	16046390	16048974	5'_2544
GV/GR/RSDI	FaST-LMM	A05	16051518	C/A	BnaA05g20690D	16035810	16038785	5'_12733
GV/GR/RSDI	FaST-LMM	A05	16051518	C/A	BnaA05g20680D	16026448	16027280	5'_24238
GV/GR/RSDI	FaST-LMM	A05	16051518	C/A	BnaA05g20670D	16022544	16023327	5'_28191
GV/GR/RSDI	FaST-LMM	A05	16051518	C/A	BnaA05g20800D	16150717	16153420	3'_99199
GV/GR/RSDI	FaST-LMM	A05	16051518	C/A	BnaA05g20790D	16148425	16150162	5'_96907
GV/GR/RSDI	GLM	C02	33196025, 33196054	C/A	BnaC02g31080D	33180297	33180984	3'_15070
GV/GR/RSDI	GLM	C02	33196025, 33196054	C/A	BnaC02g31090D	33202386	33205893	3'_6332
GV/GR/RSDI	GLM	C02	33196025, 33196054	C/A	BnaC02g31100D	33205972	33206187	3'_9918
GV/GR/RSDI	GLM	C02	33196025, 33196054	C/A	BnaC02g31110D	33207103	33208273	5'_11049
GV/GR/RSDI	GLM	C02	33196025, 33196054	C/A	BnaC02g31120D	33230034	33232499	3'_33980
GV/GR/RSDI	GLM	C02	33196025, 33196054	C/A	BnaC02g31130D	33236283	33239679	3'_40229
GV/GR/RSDI	GLM	C02	33196025, 33196054	C/A	BnaC02g31140D	33260374	33264179	3'_64320
GV/GR/RSDI	GLM	C02	33196025, 33196054	C/A	BnaC02g31150D	33266810	33269602	5'_70756
GV/GR/RSDI	GLM	C02	33196025, 33196054	C/A	BnaC02g31160D	33273829	33274915	5'_77775
GV/GR/RSDI	GLM	C02	33196025, 33196054	C/A	BnaC02g31170D	33275081	33276031	3'_79027
GV/GR/RSDI	GLM	C02	33196025, 33196054	C/A	BnaC02g31180D	33278956	33287916	5'_82902
GV/GR/RSDI	GLM	C02	33196025, 33196054	C/A	BnaC02g31190D	33289535	33292443	3'_93481
GV/GR/RSDI	FaST-LMM/GLM	C09	12949548, 12949561	G/T	BnaC09g16060D	13040366	13042182	3'_90818
GV/GR/RSDI	FaST-LMM/GLM	C09	12949548, 12949561	G/T	BnaC09g16050D	13037634	13039703	5'_88086
GV/GR/RSDI	FaST-LMM/GLM	C09	12949548, 12949561	G/T	BnaC09g16040D	13006914	13008127	3'_57366
GV/GR/RSDI	FaST-LMM/GLM	C09	12949548, 12949561	G/T	BnaC09g16030D	13005915	13006190	5'_56367
GV/GR/RSDI	FaST-LMM/GLM	C09	12949548, 12949561	G/T	BnaC09g16020D	12999491	13005747	3'_49943
GV/GR/RSDI	FaST-LMM/GLM	C09	12949548, 12949561	G/T	BnaC09g16010D	12992817	12994575	3'_43269
GV/GR/RSDI	FaST-LMM/GLM	C09	12949548, 12949561	G/T	BnaC09g16000D	12992637	12992754	3'_43089
GV/GR/RSDI	FaST-LMM/GLM	C09	12949548, 12949561	G/T	BnaC09g15990D	12992015	12992556	3'_42467
GV/GR/RSDI	FaST-LMM/GLM	C09	12949548, 12949561	G/T	BnaC09g15980D	12990072	12991906	3'_40524
GV/GR/RSDI	FaST-LMM/GLM	C09	12949548, 12949561	G/T	BnaC09g15970D	12977942	12984780	3'_28394
GV/GR/RSDI	FaST-LMM/GLM	C09	12949548, 12949561	G/T	BnaC09g15960D	12977365	12977851	3'_27817
GV/GR/RSDI	FaST-LMM/GLM	C09	12949548, 12949561	G/T	BnaC09g15950D	12945604	12947996	5'_1552
GV/GR/RSDI	FaST-LMM/GLM	C09	12949548, 12949561	G/T	BnaC09g15940D	12944519	12945229	3'_4319
GV/GR/RSDI	FaST-LMM/GLM	C09	12949548, 12949561	G/T	BnaC09g15930D	12930701	12935342	3'_14206
GV/GR/RSDI	FaST-LMM/GLM	C09	12949548, 12949561	G/T	BnaC09g15920D	12913132	12913716	5'_35832
GV/GR/RSDI	FaST-LMM/GLM	C09	12949548, 12949561	G/T	BnaC09g15910D	12910506	12912887	5'_36661
GV/GR/RSDI	FaST-LMM/GLM	C09	12949548, 12949561	G/T	BnaC09g15900D	12910150	12910410	5'_39138
GV/GR/RSDI	FaST-LMM/GLM	C09	12949548, 12949561	G/T	BnaC09g15890D	12899976	12900945	5'_48603
GV/GR/RSDI	FaST-LMM/GLM	C09	12949548, 12949561	G/T	BnaC09g15880D	12892098	12899621	5'_49927
GV/GR/RSDI	FaST-LMM/GLM	C09	12949548, 12949561	G/T	BnaC09g15870D	12879279	12883218	5'_66330
GV/GR/RSDI	FaST-LMM/GLM	C09	12949548, 12949561	G/T	BnaC09g15860D	12872657	12879205	3'_70343
GV/GR/RSDI	FaST-LMM/GLM	C09	12949548, 12949561	G/T	BnaC09g15850D	12870039	12870263	3'_79285
GV/GR/RSDI	FaST-LMM/GLM	C09	12949548, 12949561	G/T	BnaC09g15840D	12846840	12849909	3'_99639
GV/GR/RSDI	GLM	C08	35846448	C/G	BnaC08g41050D	35944758	35949975	3'_98310
GV/GR/RSDI	GLM	C08	35846448	C/G	BnaC08g41040D	35941180	35943830	3'_94732
GV/GR/RSDI	GLM	C08	35846448	C/G	BnaC08g41030D	35939890	35940377	3'_93442
GV/GR/RSDI	GLM	C08	35846448	C/G	BnaC08g41020D	35936616	35937104	3'_90168
GV/GR/RSDI	GLM	C08	35846448	C/G	BnaC08g41010D	35934556	35935372	3'_88108
GV/GR/RSDI	GLM	C08	35846448	C/G	BnaC08g41000D	35932375	35932970	3'_85927
GV/GR/RSDI	GLM	C08	35846448	C/G	BnaC08g40990D	35930183	35930744	3'_83735
GV/GR/RSDI	GLM	C08	35846448	C/G	BnaC08g40980D	35924960	35927503	5'_78512
GV/GR/RSDI	GLM	C08	35846448	C/G	BnaC08g40970D	35919916	35921840	5'_73468
GV/GR/RSDI	GLM	C08	35846448	C/G	BnaC08g40960D	35917166	35918980	5'_70718
GV/GR/RSDI	GLM	C08	35846448	C/G	BnaC08g40950D	35906554	35908628	3'_60106
GV/GR/RSDI	GLM	C08	35846448	C/G	BnaC08g40940D	35902492	35905474	3'_56044
GV/GR/RSDI	GLM	C08	35846448	C/G	BnaC08g40930D	35902098	35902339	5'_55650
GV/GR/RSDI	GLM	C08	35846448	C/G	BnaC08g40920D	35900897	35902042	3'_54449
GV/GR/RSDI	GLM	C08	35846448	C/G	BnaC08g40910D	35898068	35899474	3'_51620
GV/GR/RSDI	GLM	C08	35846448	C/G	BnaC08g40900D	35897544	35897996	3'_51096
GV/GR/RSDI	GLM	C08	35846448	C/G	BnaC08g40890D	35892730	35895626	5'_46282
GV/GR/RSDI	GLM	C08	35846448	C/G	BnaC08g40880D	35886909	35887755	5'_40461
GV/GR/RSDI	GLM	C08	35846448	C/G	BnaC08g40870D	35883156	35886643	3'_36708
GV/GR/RSDI	GLM	C08	35846448	C/G	BnaC08g40860D	35865308	35865991	3'_18860
GV/GR/RSDI	GLM	C08	35846448	C/G	BnaC08g40850D	35863233	35865234	5'_16785
GV/GR/RSDI	GLM	C08	35846448	C/G	BnaC08g40840D	35861277	35862508	5'_14829
GV/GR/RSDI	GLM	C08	35846448	C/G	BnaC08g40830D	35854479	35861042	5'_8031
GV/GR/RSDI	GLM	C08	35846448	C/G	BnaC08g40820D	35848866	35853267	3'_2418
GV/GR/RSDI	GLM	C08	35846448	C/G	BnaC08g40810D	35845971	35847958	--
GV/GR/RSDI	GLM	C08	35846448	C/G	BnaC08g40800D	35838612	35840315	3'_6133
GV/GR/RSDI	GLM	C08	35846448	C/G	BnaC08g40790D	35836627	35837986	5'_8462
GV/GR/RSDI	GLM	C08	35846448	C/G	BnaC08g40780D	35835355	35835764	3'_10684
GV/GR/RSDI	GLM	C08	35846448	C/G	BnaC08g40770D	35834366	35834500	3'_11948
GV/GR/RSDI	GLM	C08	35846448	C/G	BnaC08g40760D	35829663	35833306	5'_13142
GV/GR/RSDI	GLM	C08	35846448	C/G	BnaC08g40750D	35820784	35821662	5'_24786
GV/GR/RSDI	GLM	C08	35846448	C/G	BnaC08g40740D	35814334	35816774	3'_29674
GV/GR/RSDI	GLM	C08	35846448	C/G	BnaC08g40730D	35812486	35812779	3'_33669
GV/GR/RSDI	GLM	C08	35846448	C/G	BnaC08g40720D	35812182	35812310	3'_34138
GV/GR/RSDI	GLM	C08	35846448	C/G	BnaC08g40710D	35810089	35810774	3'_35674
GV/GR/RSDI	GLM	C08	35846448	C/G	BnaC08g40700D	35806189	35809723	3'_36725
GV/GR/RSDI	GLM	C08	35846448	C/G	BnaC08g40690D	35803867	35805916	5'_40532
GV/GR/RSDI	GLM	C08	35846448	C/G	BnaC08g40680D	35799449	35801072	5'_45376
GV/GR/RSDI	GLM	C08	35846448	C/G	BnaC08g40670D	35795321	35797055	5'_49393
GV/GR/RSDI	GLM	C08	35846448	C/G	BnaC08g40660D	35793001	35794973	5'_51475
GV/GR/RSDI	GLM	C08	35846448	C/G	BnaC08g40650D	35789391	35792831	3'_53617
GV/GR/RSDI	GLM	C08	35846448	C/G	BnaC08g40640D	35786116	35787787	3'_58661
GV/GR/RSDI	GLM	C08	35846448	C/G	BnaC08g40630D	35766115	35766579	5'_79869
GV/GR/RSDI	GLM	C08	35846448	C/G	BnaC08g40620D	35764734	35765337	3'_81111
GV/GR/RSDI	GLM	C08	35846448	C/G	BnaC08g40610D	35760077	35761640	3'_84808
GV/GR/RSDI	GLM	C08	35846448	C/G	BnaC08g40600D	35748373	35750676	5'_95772
GV II GV/GR/RSDI	FaST-LMM	A05	6692275, 6692257	T/A	BnaA05g11940D	6778017	6778916	5'_85742
GV II GV/GR/RSDI	FaST-LMM	A05	6692275, 6692257	T/A	BnaA05g11930D	6774399	6777447	5'_82124
GV/GR/RSDI II RSDI	FaST-LMM	A10	15188859, 15189187, 15189200, 15189284	C/A	BnaA10g22310D	15087591	15089318	3'_99541
GV/GR/RSDI II RSDI	FaST-LMM	A10	15188859, 15189187, 15189200, 15189284	C/A	BnaA10g22320D	15091979	15094901	5'_93958
GV/GR/RSDI II RSDI	FaST-LMM	A10	15188859, 15189187, 15189200, 15189284	C/A	BnaA10g22330D	15095081	15096207	3'_92652
GV/GR/RSDI II RSDI	FaST-LMM	A10	15188859, 15189187, 15189200, 15189284	C/A	BnaA10g22340D	15096791	15099070	5'_89789
GV/GR/RSDI II RSDI	FaST-LMM	A10	15188859, 15189187, 15189200, 15189284	C/A	BnaA10g22350D	15103226	15103583	5'_85276
GV/GR/RSDI II RSDI	FaST-LMM	A10	15188859, 15189187, 15189200, 15189284	C/A	BnaA10g22360D	15105735	15107523	3'_81336
GV/GR/RSDI II RSDI	FaST-LMM	A10	15188859, 15189187, 15189200, 15189284	C/A	BnaA10g22370D	15109098	15110305	5'_78554
GV/GR/RSDI II RSDI	FaST-LMM	A10	15188859, 15189187, 15189200, 15189284	C/A	BnaA10g22380D	15111015	15113002	5'_75857
GV/GR/RSDI II RSDI	FaST-LMM	A10	15188859, 15189187, 15189200, 15189284	C/A	BnaA10g22390D	15115079	15116902	5'_71957
GV/GR/RSDI II RSDI	FaST-LMM	A10	15188859, 15189187, 15189200, 15189284	C/A	BnaA10g22400D	15120625	15123078	3'_65781
GV/GR/RSDI II RSDI	FaST-LMM	A10	15188859, 15189187, 15189200, 15189284	C/A	BnaA10g22410D	15123758	15126598	3'_62261
GV/GR/RSDI II RSDI	FaST-LMM	A10	15188859, 15189187, 15189200, 15189284	C/A	BnaA10g22420D	15126926	15130316	3'_58543
GV/GR/RSDI II RSDI	FaST-LMM	A10	15188859, 15189187, 15189200, 15189284	C/A	BnaA10g22430D	15130375	15133378	3'_55481
GV/GR/RSDI II RSDI	FaST-LMM	A10	15188859, 15189187, 15189200, 15189284	C/A	BnaA10g22440D	15133739	15136450	5'_52409
GV/GR/RSDI II RSDI	FaST-LMM	A10	15188859, 15189187, 15189200, 15189284	C/A	BnaA10g22450D	15142168	15143781	3'_45078
GV/GR/RSDI II RSDI	FaST-LMM	A10	15188859, 15189187, 15189200, 15189284	C/A	BnaA10g22460D	15144766	15146447	5'_42412
GV/GR/RSDI II RSDI	FaST-LMM	A10	15188859, 15189187, 15189200, 15189284	C/A	BnaA10g22470D	15146865	15148154	5'_40705
GV/GR/RSDI II RSDI	FaST-LMM	A10	15188859, 15189187, 15189200, 15189284	C/A	BnaA10g22480D	15148835	15150550	5'_38309
GV/GR/RSDI II RSDI	FaST-LMM	A10	15188859, 15189187, 15189200, 15189284	C/A	BnaA10g22490D	15150870	15152736	3'_36123
GV/GR/RSDI II RSDI	FaST-LMM	A10	15188859, 15189187, 15189200, 15189284	C/A	BnaA10g22500D	15155649	15155907	3'_32952
GV/GR/RSDI II RSDI	FaST-LMM	A10	15188859, 15189187, 15189200, 15189284	C/A	BnaA10g22510D	15156247	15157759	3'_31100
GV/GR/RSDI II RSDI	FaST-LMM	A10	15188859, 15189187, 15189200, 15189284	C/A	BnaA10g22520D	15158961	15159624	3'_29235
GV/GR/RSDI II RSDI	FaST-LMM	A10	15188859, 15189187, 15189200, 15189284	C/A	BnaA10g22530D	15160796	15162084	5'_26775
GV/GR/RSDI II RSDI	FaST-LMM	A10	15188859, 15189187, 15189200, 15189284	C/A	BnaA10g22540D	15167046	15168301	5'_20558
GV/GR/RSDI II RSDI	FaST-LMM	A10	15188859, 15189187, 15189200, 15189284	C/A	BnaA10g22550D	15168537	15172069	5'_16790
GV/GR/RSDI II RSDI	FaST-LMM	A10	15188859, 15189187, 15189200, 15189284	C/A	BnaA10g22560D	15173521	15178533	5'_10326
GV/GR/RSDI II RSDI	FaST-LMM	A10	15188859, 15189187, 15189200, 15189284	C/A	BnaA10g22570D	15178900	15181049	5'_7810
GV/GR/RSDI II RSDI	FaST-LMM	A10	15188859, 15189187, 15189200, 15189284	C/A	BnaA10g22580D	15181345	15183466	3'_5393
GV/GR/RSDI II RSDI	FaST-LMM	A10	15188859, 15189187, 15189200, 15189284	C/A	BnaA10g22590D	15188457	15190992	--
GV/GR/RSDI II RSDI	FaST-LMM	A10	15188859, 15189187, 15189200, 15189284	C/A	BnaA10g22600D	15192133	15194898	5'_3274
GV/GR/RSDI II RSDI	FaST-LMM	A10	15188859, 15189187, 15189200, 15189284	C/A	BnaA10g22610D	15195155	15198443	5'_6296
GV/GR/RSDI II RSDI	FaST-LMM	A10	15188859, 15189187, 15189200, 15189284	C/A	BnaA10g22620D	15198991	15199835	5'_10132
GV/GR/RSDI II RSDI	FaST-LMM	A10	15188859, 15189187, 15189200, 15189284	C/A	BnaA10g22630D	15200208	15201522	5'_11349
GV/GR/RSDI II RSDI	FaST-LMM	A10	15188859, 15189187, 15189200, 15189284	C/A	BnaA10g22640D	15201628	15202514	3'_12769
GV/GR/RSDI II RSDI	FaST-LMM	A10	15188859, 15189187, 15189200, 15189284	C/A	BnaA10g22650D	15202958	15205044	3'_14099
GV/GR/RSDI II RSDI	FaST-LMM	A10	15188859, 15189187, 15189200, 15189284	C/A	BnaA10g22660D	15205282	15206358	5'_16423
GV/GR/RSDI II RSDI	FaST-LMM	A10	15188859, 15189187, 15189200, 15189284	C/A	BnaA10g22670D	15207926	15210513	3'_19067
GV/GR/RSDI II RSDI	FaST-LMM	A10	15188859, 15189187, 15189200, 15189284	C/A	BnaA10g22680D	15220364	15221445	5'_31505
GV/GR/RSDI II RSDI	FaST-LMM	A10	15188859, 15189187, 15189200, 15189284	C/A	BnaA10g22690D	15221682	15223412	3'_32823
GV/GR/RSDI II RSDI	FaST-LMM	A10	15188859, 15189187, 15189200, 15189284	C/A	BnaA10g22700D	15223544	15224043	5'_34685
GV/GR/RSDI II RSDI	FaST-LMM	A10	15188859, 15189187, 15189200, 15189284	C/A	BnaA10g22710D	15224102	15226063	3'_35243
GV/GR/RSDI II RSDI	FaST-LMM	A10	15188859, 15189187, 15189200, 15189284	C/A	BnaA10g22720D	15226232	15227115	5'_37373
GV/GR/RSDI II RSDI	FaST-LMM	A10	15188859, 15189187, 15189200, 15189284	C/A	BnaA10g22730D	15229514	15231918	3'_40655
GV/GR/RSDI II RSDI	FaST-LMM	A10	15188859, 15189187, 15189200, 15189284	C/A	BnaA10g22740D	15232522	15235024	5'_43663
GV/GR/RSDI II RSDI	FaST-LMM	A10	15188859, 15189187, 15189200, 15189284	C/A	BnaA10g22750D	15235470	15237795	5'_46611
GV/GR/RSDI II RSDI	FaST-LMM	A10	15188859, 15189187, 15189200, 15189284	C/A	BnaA10g22760D	15238159	15241999	5'_49300
GV/GR/RSDI II RSDI	FaST-LMM	A10	15188859, 15189187, 15189200, 15189284	C/A	BnaA10g22770D	15246602	15249288	3'_57743
GV/GR/RSDI II RSDI	FaST-LMM	A10	15188859, 15189187, 15189200, 15189284	C/A	BnaA10g22780D	15249796	15252481	5'_60937
GV/GR/RSDI II RSDI	FaST-LMM	A10	15188859, 15189187, 15189200, 15189284	C/A	BnaA10g22790D	15252733	15255610	3'_63874
GV/GR/RSDI II RSDI	FaST-LMM	A10	15188859, 15189187, 15189200, 15189284	C/A	BnaA10g22800D	15258117	15259990	3'_69258
GV/GR/RSDI II RSDI	FaST-LMM	A10	15188859, 15189187, 15189200, 15189284	C/A	BnaA10g22810D	15261905	15266130	5'_73046
GV/GR/RSDI II RSDI	FaST-LMM	A10	15188859, 15189187, 15189200, 15189284	C/A	BnaA10g22820D	15266296	15267019	3'_77437
GV/GR/RSDI II RSDI	FaST-LMM	A10	15188859, 15189187, 15189200, 15189284	C/A	BnaA10g22830D	15267095	15267969	5'_78236
GV/GR/RSDI II RSDI	FaST-LMM	A10	15188859, 15189187, 15189200, 15189284	C/A	BnaA10g22840D	15268116	15276123	3'_79257
GV/GR/RSDI II RSDI	FaST-LMM	A10	15188859, 15189187, 15189200, 15189284	C/A	BnaA10g22850D	15278666	15281149	3'_89807
GV/GR/RSDI II RSDI	FaST-LMM	A10	15188859, 15189187, 15189200, 15189284	C/A	BnaA10g22860D	15281529	15283615	5'_92670
GV/GR/RSDI II RSDI	FaST-LMM	A10	15188859, 15189187, 15189200, 15189284	C/A	BnaA10g22870D	15283691	15286159	3'_94832
GV/GR/RSDI II RSDI	FaST-LMM	A10	15188859, 15189187, 15189200, 15189284	C/A	BnaA10g22880D	15287668	15290955	5'_98809
Distance (bp), the distance between significant SNPs and candidate genes; GLM, general linear model; FaST-LMM, factored spectrally transformed linear mixed model; GV, germination vigor; GR, germination rate; RSDI, relative salt damage index.
